# 1    **Glucose intake hampers PKA-regulated HSP90 chaperone activity**

2

3    Yu-Chen Chen<sup>1,6</sup>, Pei-Heng Jiang<sup>1,6</sup>, Hsuan-Ming Chen<sup>1</sup>, Chang-Han Chen<sup>1</sup>, Yi-Ting

4    Wang<sup>2</sup>, Yu-Ju Chen<sup>2</sup>, Chia-Jung Yu<sup>3,4</sup>, and Shu-Chun Teng<sup>1,5,\*</sup>

5

6    <sup>1</sup>Department of Microbiology, College of Medicine, National Taiwan University,

7    Taipei, Taiwan

8    <sup>2</sup>Institute of Chemistry, Academia Sinica, Taipei, Taiwan

9    <sup>3</sup>Department of Cell and Molecular Biology, College of Medicine, Chang Gung

10    University, Tao-Yuan, Taiwan

11    <sup>4</sup>Department of Thoracic Medicine, Chang Gung Memorial Hospital, Linkou,

12    Tao-Yuan, Taiwan

13    <sup>5</sup>Center of Precision Medicine, National Taiwan University, Taipei, Taiwan

14

15    <sup>6</sup>These authors contributed equally to this article.

16    \* Address correspondence to:

17    Shu-Chun Teng, Department of Microbiology, College of Medicine, National Taiwan

18    University, No. 1, Sec. 1, Jen-Ai Road, Taipei, 10051, Taiwan; Tel: (886) 2-23123456

19    ext. 88294; Fax: (886) 2-23915293; E-mail: shuchunteng@ntu.edu.tw

20

21 **Running Title: A crosstalk between two hallmarks of aging - nutrient sensing**

22 **and proteostasis**

23

## 24    **Abstract**

25        Aging is an intricate phenomenon associated with the gradual loss of  
 26    physiological functions, and both nutrient sensing and proteostasis control lifespan.  
 27    Although multiple approaches have facilitated the identification of candidate genes  
 28    that govern longevity, the molecular mechanisms that link aging pathways are still  
 29    elusive. Here, we conducted a quantitative mass spectrometry screen and identified all  
 30    phosphorylation/dephosphorylation sites on yeast proteins that significantly  
 31    responded to calorie restriction, a well-established approach to extend lifespan.  
 32    Functional screening of 135 potential regulators uncovered that Ids2 is activated by  
 33    PP2C under CR and inactivated by PKA under glucose  
 34    intake. *ids2Δ* or *ids2* phosphomimetic cells displayed heat sensitivity and lifespan  
 35    shortening. Ids2 serves as a co-chaperone to form a complex with Hsc82 or the  
 36    redundant Hsp82, and phosphorylation of Ids2 impedes its association with chaperone  
 37    HSP90. Thus, PP2C and PKA orchestrate glucose sensing and protein folding to  
 38    enable cells to maintain protein quality for sustained longevity.

39

## 40 **Introduction**

41       Aging is a complex process in which cells gradually lose their ability to execute  
42 regular functions and organs show increased susceptibility to disease (1). The causes  
43 of aging have been attributed to nine hallmarks (2). However, crosstalk between these  
44 hallmarks is rare. Calorie restriction (CR) is the most effective intervention known to  
45 extend lifespan (3), improve organism function, and retard cell senescence in a variety  
46 of species from yeast to mammals (3-6). CR delays the onset and/or reduces the  
47 incidence of many age-related diseases, including cancer, diabetes, and cardiovascular  
48 disorders (7, 8).

49       Budding yeast has been perceived as an advantageous model to conveniently  
50 examine and isolate new components in aging-related pathways. In yeast, CR can be  
51 modelled by reducing the glucose concentration of the media from 2% as the *ad*  
52 *libitum* concentration to 0.5% (or lower), resulting in a 30%-40% increase in lifespan  
53 (6, 9). Two different lifespan paradigms are established in querying the lifespan of  
54 yeast cells: the replicative lifespan (10) and chronological lifespan (CLS). RLS  
55 denotes the number of daughter cells that a single mother cell can generate before  
56 senescence, representing the division potential of the mother cell (11), whereas CLS  
57 refers to the length of time for which yeast cells remain viable in a non-dividing state  
58 (12).

CR exerts anti-aging effects by regulating metabolism (13) and enhancing stress resistance (14). These processes down-regulate the amino acid-sensing mTOR and the glucose-sensing PKA signalling pathways (15). Attenuation of Tor1, Sch9, and PKA kinases promotes activation of Rim15 kinase-mediated transcription factors Msn2/4 and Gis1 to increase pathways in glycogen accumulation, antioxidant enzyme formation, heat shock protein expression, and autophagy (16). Moreover, CR-mediated Tor1 repression enhances Snf1 kinase (the mammalian AMP kinase homologue in yeast) (17) to extend CLS by promoting respiration, acetyl-CoA levels, and autophagy (18-21). Although these signalling pathways regulated by CR-modulated phosphorylation have been studied thoroughly, we speculate that there are other unknown regulators remaining to be explored. Here, we developed a screening procedure to discover additional pathways regulated under CR.

## **Results**

### **A phosphoproteomic screening method identified Ids2 dephosphorylation under CR.**

To explore anti-aging mechanisms, we performed mass spectrometry-based quantitative phosphoproteomic profiling to globally define the phosphorylation and dephosphorylation sites of regulated proteins under CR. The triplicate

phosphoproteome maps generated from each calorie-restricted or normal glucose-treated sample were annotated with the phosphopeptides of unambiguously identified phosphorylated amino acid sequences (S1a Fig.). Over 2,672 unique phosphopeptides on 949 proteins were identified ( $p < 0.05$ , S1 Data). The rightward shift in the 2% glucose/0.5% glucose ratio of phosphopeptides in S1b Fig. indicated that the abundance of phosphopeptides decreased under 0.5% glucose, which is in agreement with that many kinases, such as Tor, Sch9, and PKA, were downregulated under CR (15). Among these phosphopeptides, 318 proteins (508 phosphopeptides) showed a 2-fold increase under 0.5% glucose, meaning that these peptides were phosphorylated under a glucose-limited CR environment; 427 proteins (825 phosphopeptides) showed a 2-fold decrease under 0.5% glucose, indicating that these peptides were phosphorylated under a glucose-enriched environment; and 113 proteins contained both increased and decreased phosphopeptides on the same protein under 0.5% glucose.

To discover additional pathways regulated by phosphorylation under CR, we designed an in silico and functional screening procedure (Fig. 1a). We submitted a total of 632 proteins quantified with 2-fold differential phosphorylation to Gene Ontology (GO) analysis (22). Among them, 334 phosphoproteins were annotated to participate in biological processes including glycolysis ( $p < 0.01$ ), cytokinesis ( $p <$

0.01), signal transduction ( $p < 1.0 \times 10^{-3}$ ), cell communication ( $p < 1.0 \times 10^{-3}$ ), transcription ( $p < 1.0 \times 10^{-5}$ ), and stress response ( $p < 1.0 \times 10^{-4}$ ) (S1c Fig.). Many instances of phosphorylation regulation in our database coincided with the existing CR/nutrient-sensing pathways (23), such as PKA, Tor, and Snf1 (15) (S1d Fig.). In previous studies, CR has been shown to extend lifespan through an increase in respiration (6), augmentation of cellular protection (15), and induction of autophagy (24). Thus, we challenged the deletion strains of 135 candidates in the top categories of the GO analysis with various stresses, including heat shock, oxidative stress, DNA replicative stress, and/or nonfermentable carbon growth. We also verified the efficiency of autophagy by a GFP-Atg8 cleavage assay (25). Phenotypic analyses exhibited that 53 deletion strains showed defective phenotypes (S2 Data and S2 Fig.). Phosphomimetic and/or dephosphomimetic mutations of these 53 candidates were generated to verify the functions observed in the deletion strains, and only the *ids2-S148D* phosphomimetic strain displayed a growth defect in heat shock and glycerol (Fig. 1b). According to our mass spectrometry data (S3a Fig.), S148 on Ids2 was identified (Ids2 RRSS<sup>148</sup>IQDVQWIR) to be dephosphorylated under CR. The growth defect under CR was observed in *ids2Δ* and *ids2-S148D* cells (Fig. 1c). Moreover, the *ids2-S148D* phosphomimetic strains showed shortened CLS (Fig. 1d). Ids2 is involved in the modulation of Ime2 during meiosis (26); however, it

is a functionally unknown protein in the mitotic cell cycle. We therefore speculated that Ids2-S148 phosphorylation may play an important role in stress response and lifespan control.

## **PKA phosphorylates Ids2 upon glucose intake, and PP2C dephosphorylates Ids2 under CR.**

To verify the CR-mediated Ids2 phosphorylation, Western blot analysis was conducted. Ids2-S148 phosphorylation was found to be decreased under CR (Fig. 2a and S3b Fig.) but not under nitrogen starvation or TOR pathway inhibition (Fig. 2b and S3c Fig.). Based on the PhosphoGRID and pKaPS databases (27), Ids2 RRSS<sup>148</sup>IQD may be phosphorylated by PKA (score = 1.57). Deletion of one PKA catalytic subunit, *TPK3*, reduced the Ids2 phosphorylation significantly (Fig. 2c), suggesting that Tpk3 may phosphorylate S148. Deletion of *RAS2* or *GPA2*, the two PKA upstream regulators did not affect Ids2 phosphorylation (S3d Fig.), implying that they act in a redundant manner. An in vitro kinase assay demonstrated that GST-Ids2 was phosphorylated by wild-type PKA kinase from the extract of the KT1115 strain (Fig. 2d) or by the bovine heart PKA catalytic subunit C (S3e Fig.) but not by the extract of the PKA kinase-dead strain (Fig. 2d). These results indicated that PKA may directly phosphorylate Ids2-S148.



To determine the phosphatase(s) dephosphorylating Ids2-S148, we examined the phosphorylation levels in the mutants of major phosphatases. The Ids2 phosphorylation level increased in *ptc2Δ ptc3Δ* cells compared with that in the wild-type (Fig. 2e). An in vitro phosphatase assay showed that recombinant Ptc2 removed the S148 phosphorylation (Fig. 2f), indicating that PP2C may directly dephosphorylate Ids2. Moreover, a spotting assay showed that the *ids2-S148A* mutation could rescue the growth defect in the *ptc2Δ*, *ptc3Δ* and *ptc2Δ ptc3Δ* mutants (Fig. 2g), suggesting that the PP2C phosphatases (28) may dephosphorylate Ids2.

#### **Ids2 interacts with chaperone HSP90 in a phosphorylation-modulated manner.**

To understand the molecular mechanism that Ids2 participates in under CR, we searched for its interaction partners via tandem affinity purification (TAP) and mass spectrometry analysis (29). The bead-bound proteins were separated (Fig. 3a), and spectrometry analysis revealed two closely related proteins, Hsc82 and Hsp82 (30), in the yeast HSP90 family (S3 Data). Expression of Hsc82 is higher than that of Hsp82 under normal conditions, suggesting that Hsc82 plays a more prominent role (30). The co-immunoprecipitation assay showed that Hsc82-HA<sub>3</sub> co-precipitated with Ids2-Myc<sub>13</sub> (Fig. 3b). A yeast two-hybrid analysis revealed that amino acids 92-256 of Ids2 interact with amino acids 272-579 of Hsc82 (S4 Fig.). Immunoprecipitation of

Ids2-S148D with Hsc82 was significantly decreased, while the Ids2-S148A mutation increases the interaction with Hsc82 (Fig. 3c). In addition, the phosphomimetic S148D mutation of purified recombinant Ids2 impaired the Ids2-Hsc82 interaction in the affinity pull-down assay (Fig. 3d), suggesting that the phosphorylation of S148, which is located within the interacting motif (92-256), may inhibit the Ids2-Hsc82 interaction. To examine the interaction between Ids2 and Hsc82 under CR, an overnight culture was refreshed in medium with 2 % or 0.5 % glucose. As expected, CR significantly increased the Ids2-Hsc82 interaction (Fig. 3e).

### **Ids2 acts as a co-chaperone in the HSP90-mediated protein-folding process.**

HSP90 is an essential eukaryotic chaperone with a well-established role in folding and maintenance of proteins that are associated with the cell signalling response, such as kinases and hormone receptors (30). However, the active participation of co-chaperone proteins at various stages of the chaperone folding cycle is crucial for the completion of the folding process (31). Due to the physical interaction between Ids2 and Hsc82, we speculated that Ids2 may function as either a substrate or a regulator of HSP90. Deletion of *HSC82* did not change the stability of Ids2, suggesting that Ids2 may not be a substrate of Hsc82 (S5 Fig.). Many co-chaperones can regulate HSP90 ATPase, an activity essential for its chaperoning

action (32, 33). To test whether Ids2 could modulate the ATPase activity of Hsc82, we performed an Hsc82 ATPase assay with increasing concentration of Ids2 or Ids2-S148D. The assay revealed that Ids2 triggers ATPase activity of Hsc82 and phosphorylation of Ids2 attenuates the reaction (Fig. 4a). Hsc82 is required for mitochondrial F1-ATPase assembly (34). The *ids2Δ* and *ids2-S148D* strains displayed a growth defect in glycerol (Fig. 4b), and formed white colonies, which are caused by the loss of mitochondrial function in the W303-1A strain (35) (Fig. 4b), implying that the phosphorylation of Ids2 may hamper the Hsc82 chaperone activity and thereby diminish the mitochondrial function.

We next asked whether Ids2 acts as a co-chaperone of HSP90 in the establishment of the HSP90-mediated protein-folding process. A firefly luciferase reporter assay was used to determine the ability of HSP90-dependent protein refolding (36). Western blot analysis revealed that the protein abundance of firefly luciferase was slightly reduced in *ids2Δ* cells compared to that in *hsc82Δ* cells at 30 °C; however, luciferase expression was completely lost in *ids2-S148D* cells, while *ids2-S148A* cells expressed an amount of firefly luciferase equivalent to that of the wild-type (Fig. 4c). Meanwhile, firefly luciferase could not be detected in the *ids2Δ* and *hsc82Δ* strains at 37 °C. Since the accumulation of misfolded proteins would result in degradation (36), a mutant HSP90 chaperone or a dissociation of the

chaperone folding network could cause mass accumulation and subsequent degradation of HSP90-dependent substrates. Taken together, these findings further elucidate that Ids2 may act as a co-regulator for the chaperone activity of HSP90. Since *ids2-S148D* cells displayed a more conspicuous defective phenotype than *ids2Δ* cells, constitutive Ids2 phosphorylation may elicit a greater dominant-negative effect on the chaperone response.

Protein aggregates are found in a variety of diseases, including type II diabetes, Parkinson's disease, and Alzheimer's disease (37). In yeast, many cellular protein aggregates form during aging, for example, Gln1 aggregates with HSP90 upon glucose deprivation and cellular aging (38). Thus, we speculated that compromising the function of Ids2 may lead to aggregation of Gln1. We examined the Gln1-GFP localization in *ids2* phosphomimetic mutants under glucose deprivation (Fig. 4d). The number of Gln1 foci in *ids2-S148D* mutants was dramatically increased compared to that in wild-type and *ids2-S148A* strains, implying that Ids2 phosphorylation may trigger Gln1 aggregation through down-regulation of HSP90 activity.

## Discussion

Multiple approaches that integrate large genomic and proteomic datasets have facilitated the identification of factors governing longevity. However, crosstalk

between these aging pathways is rare. Both nutrient sensing and proteostasis control lifespan. Here, our phosphoproteomic screen mapped 632 yeast proteins containing CR-responsive phosphorylation. Coupled with functional analyses, we identified a co-chaperone protein, Ids2, which is inactivated under glucose intake. The PKA writer and PP2C eraser orchestrate glucose sensing and protein folding, and phosphorylation of Ids2 impedes its association with HSP90. Thus, glucose concentration influences the HSP90 chaperone activity, enabling cells to control protein quality under environmental conditions for sustained longevity (Fig. 5). Our findings are consistent with a previous large-scale analysis of the genetic interaction between HSP90 and Ids2 (39). We predict that Ids2 is a key regulator in promoting cellular tolerance to stress. HSP90 is a conserved protein controlling late protein-folding steps. Interestingly, sequence alignments of Ids2 show a certain degree of sequence similarity across homologues of HSP90 co-chaperones (S6 Fig.), including the S148 residue. It will be interesting to learn whether Ids2 homologues in other organisms also control lifespan.

Two lines of observation demonstrated that glucose intake modulates HSP90: high-glucose consumption boosts rat Hsp90 expression (40) and PKA-mediated porcine Hsp90 $\alpha$  phosphorylation enhances the translocation of endothelial Hsp90 $\alpha$  to the cell surface (41). Through this study, we discovered a previously underappreciated

glucose-mediated chaperone regulatory process: glucose concentration controls HSP90 activity by PKA-dependent co-chaperone phosphorylation. Other than glucose consumption, heat shock (42) and oxidative stress (43) have been shown to regulate the PKA pathway. Indeed, heat shock and oxidative stress both hamper Ids2 phosphorylation, suggesting that cells use Ids2 dephosphorylation to stimulate chaperone activity for coping with various stresses.

We revealed that PP2C phosphatase antagonizes the function of PKA to extend lifespan. *S. cerevisiae* encodes seven phosphatases in the type 2C Ser/Thr phosphatase (PP2C) superfamily (Ptc1-Ptc7) (44), and Ptc1, Ptc2 and Ptc3 are negative regulators of MAPK (45). In deficiencies of the MAPK pathway, cells elevate their stress tolerance ability to extend CLS (46). Although currently there is no direct evidence that PP2C may control stress tolerance through the MAPK pathway, our study provides a means by which PP2C governs stress tolerance: PP2C removes PKA-mediated Ids2 phosphorylation to maintain ample chaperone activity.

Finally, what is the role of Ids2 in protein folding at the molecular level? HSP90 forms a homodimeric complex, which consists of an N-terminal nucleotide binding domain (NBD), a middle domain (M), and a C-terminal dimerization domain (CTD) (47). Co-chaperones can bind to specific domains of HSP90 to stabilize its conformation and further modulate its function. For example, yeast Sti1/Hop and

human FKBP51 and FKBP52 utilize their tetratricopeptide (TPR) domains to interact with the C-terminal EEVD motif of HSP90 (48) to stabilize chaperones. Moreover, the N-terminal region of co-chaperone Aha1 interacts with the M domain of HSP90 to stabilize its closed state conformation and thereby increase its ATPase activity (49). Our domain mapping results determined that Ids2 also binds to the M domain of HSP90 and stimulates the ATPase activity of HSP90. In addition, Ids2 forms complex with Aha1 in our MS/MS data of the Ids2-TAP complex. Thus, it will be of interest to investigate the different controlling mechanisms and client specificities of Ids2 and Aha1 in modulating HSP90. Much work will be required to understand the mechanistic role of co-chaperone Ids2.

## **Methods**

### **Plasmids and Yeast Strains**

The yeast strains and plasmids used in this study are listed in S4 Data. Standard genetic and cloning methods were used for all constructions. pYES2-Ids2-TAP was generated by ligation of a PCR product from the Ids2-TAP HISMX6 strain into the KpnI-XhoI-treated pYES2. Kanamycin-resistant knockout strains were constructed through the transformation of kanamycin selection cassette fragments derived from PCR of BY4741. pRS306-*ids2* and other yeast integrating plasmids were

PCR-amplified and cloned into pRS306. Single-point or multiple-site mutations were introduced into pRS306-based plasmids by site-directed mutagenesis. The oligonucleotides designed for mutagenesis and double crossover are listed in S4 Data or are available upon request. To generate chromosomal mutants of these genes, the pRS306-based plasmids were linearized by the appropriate restriction enzymes and transformed into the wild-type strain. After confirming the pop-in structure by Southern blot analysis and 5-FOA selection, the *URA3* pop-out mutants were selected and verified by PCR and sequencing. The C-terminal-tagged Gln1 was created by insertion of the PCR products of the GFP-*HIS3* cassette.

## **Sample Preparation for Phosphopeptide Enrichment**

Yeast cells were grown in yeast extract peptone dextrose (YPD) medium (1 % yeast extract, 2 % bacto-peptone) supplemented with 2 % (normal condition) or 0.5 % glucose (calorie-restricted) for 3 hours and then harvested from log-phase growing cultures. Protein samples were extracted and subjected to gel-assisted digestion (50). First, proteins were fixed by sodium dodecyl sulfate-polyacrylamide gel electrophoresis (SDS-PAGE) directly, and the gel was cut into five pieces for trypsin proteolytic digestion. Digested peptides were extracted three times for 30 mins each and completely dried by vacuum centrifugation at room temperature. Then, we used a



homemade immobilized metal affinity column for phosphopeptide enrichment (51).

An Ultra-Performance LC<sup>TM</sup> system (Waters) was used for automated purification of phosphopeptides. The Ni<sup>2+</sup> ions were removed, and the nitrilotriacetic acid resin was activated. The peptide samples from trypsin digestion were re-established in loading buffer and loaded into an activated immobilized metal affinity chromatography column. Finally, the unbound peptides were removed, and the bound peptides were eluted.

## LC-MS/MS Analysis

The purified phosphopeptides were analyzed in triplicate LC-MS/MS by an LTQ-Orbitrap XL hybrid mass spectrometer interfaced with an Agilent 1100 series HPLC. Survey full-scan MS spectra were acquired in the Orbitrap ( $m/z$  350–1600) with the resolution set to 60,000 at  $m/z$  400 and the automatic gain control target at 106. The 10 most intense ions were sequentially isolated for an MS/MS scan using collision-induced dissociation and detection in the linear ion trap with previously selected ions and dynamic exclusion for 90 seconds. All the measurements in the Orbitrap were performed with the lock mass option for internal calibration. Raw MS/MS data from the LTQ-Orbitrap were transformed to msm files using RAW2MSM software (version 1.1). The msm files were searched using Mascot

(version 2.2.1) against the Swiss-Prot *Saccharomyces cerevisiae* database (version 54.2, 6493 sequences) with the following exceptions: only tryptic peptides with up to two missed cleavage sites were allowed, the fragment ion mass tolerance was set at 10 ppm, and the parent ion tolerance was set at 0.6 Da. Phosphorylation (52) and oxidation (M) were specified as variable modifications. Peptides were considered identified if their Mascot individual ion score was greater than 20 ( $p < 0.05$ ). The false discovery rates for Orbitrap data were determined with a Mascot score greater than 20 ( $p < 0.05$ ). The quantitative analysis of phosphopeptides was performed with the SEMI label-free algorithm (53). The raw data files acquired from the LTQ-Orbitrap were converted into files of the mzXML format by the program ReAdW, and the search results in MASCOT were exported in Extensible Markup Language data (.xml) format. After data conversion, the confident peptide identification results ( $p < 0.05$ ) from each LC-MS/MS run were loaded and merged to establish a global peptide information list (sequence, elution time, and mass-to-charge ratio). Alignment of elution time was then performed based on the peptide information list using linear regression in different LC-MS/MS runs followed by correction of aberrational chromatographic shifts across fragmental elution-time domains. The mass spectrometry raw datasets were deposited to the ProteomeXchange Consortium (54) (<http://proteomecentral.proteomexchange.org>) via the PRIDE partner repository with

the dataset identifier PXD001368 and DOI 10.6019/PXD001368. The quantitation results for phosphopeptides listed in S1 Data were obtained using IDEAL-Q software and further checked manually (55).

## **Bioinformatics Analysis - Gene Ontology Enrichment Analysis and KEGG**

### **Orthology Analysis**

To functionally define the genes identified in this study, we performed Gene Ontology (GO), network, and pathway analyses using the PANTHER classification system (22) (<http://www.pantherdb.org/>). The genes showing a 2-fold change with Bonferroni multiple correction testing were annotated for GO terms. The spatial-compartmental relationship and the genome annotation between the phosphopeptides were defined through the use of KEGG (Kyoto Encyclopedia of Genes and Genomes) orthology, a genomic, biochemical and enzyme-substrate metabolism-based online database developed by the team of Minoru Kanehisa of Kyoto University (56).

### **Stress Resistance Assay**

Yeast cells were first grown overnight in yeast extract peptone (YEP) or synthetic complete(54) glucose medium at 30 °C. Then, cells were re-inoculated into

fresh YEP or SC medium and grown to exponential phase ( $OD_{600} = 0.5$ ). Tenfold serial dilutions of indicated strains were spotted onto YEP with 2% glucose (YEPD), YEP with 3% glycerol (YEPG), or SC glucose plates containing various concentrations of chemicals: 0.04 % Methyl methanesulfonate (MMS), 100 mM hydroxyurea, 10 mM  $H_2O_2$ , 400 mM LiCl, 50  $\mu$ g/ml hygromycin B (Hyg B), and 5 nM rapamycin, and incubated at 30 °C (normal) or 37 °C (heat shock) for 2-3 days.

### **Chronological Lifespan Assay**

The CLS assay of wild-type, *ids2 $\Delta$* , *ids2-S148A* and *ids2-S148D* strains were carried out as previous described (57, 58). Viability at day 3, when the yeast had reached stationary phase, was defined as the point of 100 % survival. Thereafter, aliquots from the culture were diluted according to the estimated survival and plated on YEPD plates every other day. After 3 days of incubation at 30 °C, colony-forming units were calculated. A semi-quantitative CLS spotting assay was also performed as previously described (59). In brief, the same cell numbers from the culture were serially diluted 10-fold and spotted on YEPD plates every 2 days.

### **Tandem Affinity Purification**

362 Tandem affinity purification of Ids2 was performed as previously described (60)  
363 in the protocol from the Yeast Resource Center of the University of Washington. In  
364 brief, the BJ2168 pYES2-Ids2-TAP strain was inoculated into 1 litre SC with 2%  
365 raffinose and grown to log phase prior to adding galactose to induce protein  
366 overexpression. Cells were lysed with lysis buffer (150 mM NaCl, 1 % Nonidet P-40,  
367 50 mM Tris-HCl pH 7.5, and protease inhibitors) and with the use of glass beads and  
368 a homogenizer. Then, 250 µL of IgG Sepharose 6 Fast Flow prep in 1:1 slurry in  
369 NP-40 was added to the lysate and incubated at 4 °C for 2 hours with gentle shaking.  
370 Beads were washed 3 times with lysis buffer and once with TEV cleavage buffer.  
371 Fifty units of TEV protease (Thermos) was added, and the solution was incubated  
372 overnight. The supernatant was collected, and calmodulin-binding buffer (25 mM  
373 Tris-HCl pH 8.0, 150 mM NaCl, 1 mM Mg acetate, 1 mM imidazole, 2 mM CaCl<sub>2</sub>, 10  
374 mM β-mercaptoethanol, 0.1 % NP-40) and 200 µL of calmodulin sepharose beads  
375 (GE Healthcare) were added for a 2-hour incubation at 4 °C. Samples were washed,  
376 and the bound proteins were eluted into fractions with calmodulin elution buffer (25  
377 mM Tris-HCl, pH 8.0, 150 mM NaCl, 1 mM Mg acetate, 1 mM imidazole, 20 mM  
378 EGTA, 10 mM β-mercaptoethanol, 0.1 % NP-40). The eluents were combined and  
379 precipitated with 25 % trichloroacetic acid. The samples were analyzed with 10 %

SDS-PAGE gels and stained with silver stain. Bands were cut out and trypsinized for mass spectrometry analysis.

### **One-dimensional SDS-PAGE combined nano-LC-MS/MS (GeLC-MS/MS)**

To identify the Ids2-TAP interacting proteins, GeLC-MS/MS, one of the targeted proteomics approaches, was applied as described previously (29). Briefly, gel pieces were destained in 50 mM  $\text{NH}_4\text{HCO}_3$ /ACN (3:2, v/v) three times for 25 min each, dehydrated in ACN and dried in a SpeedVac. In-gel proteins were reduced with 10 mM dithiothreitol in 25 mM  $\text{NH}_4\text{HCO}_3$  at 56 °C for 45 min, allowed to stand at room temperature (RT) for 10 min, and then alkylated with 55 mM iodoacetamide in the dark for 30 min at RT. After the proteins were digested by sequencing grade modified porcine trypsin (1:100; Promega, Madison, WI) overnight at 37 °C, peptides were extracted from the gel with ACN to a final concentration of 50%, dried in a SpeedVac, and then stored at 20 °C for further use. For reverse-phase LC-MS/MS analysis, each peptide mixture was resuspended in HPLC buffer A (0.1% formic acid, Sigma, St. Louis, MO) and loaded into a trap column (Zorbax 300SB- $\text{C}_{18}$ ,  $0.3 \times 5$  mm, Agilent Technologies, Wilmington, DE) at a flow rate of 0.2  $\mu\text{L}/\text{min}$  in HPLC buffer A. The salts were washed with buffer A at a flow rate of 20  $\mu\text{L}/\text{min}$  for 10 min, and the desalted peptides were then separated on a 10 cm analytical  $\text{C}_{18}$  column (inner

diameter, 75  $\mu$ m). The peptides were eluted by a linear gradient of 0–10% HPLC buffer B (99.9% ACN containing 0.1% formic acid) for 3 min, 10–30% buffer B for 35 min, 30–35% buffer B for 4 min, 35–50% buffer B for 1 min, 50–95% buffer B for 1 min, and 95% buffer B for 8 min at a flow rate of 0.25  $\mu$ L/min across the analytical column. The LC setup was coupled online to an LTQ-Orbitrap linear ion trap mass spectrometer (Thermo Scientific, San Jose, CA) operated using Xcalibur 2.0.7 software (Thermo Scientific). Full-scan MS was performed using the Orbitrap in an MS range of 400–2000 Da, and the intact peptides were detected at a resolution of 30,000. Internal calibration was performed using the ion signal of cyclosiloxane peaks at  $m/z$  536.165365 as a lock mass. A data-dependent procedure was applied that alternated between one MS survey scan and six MS/MS scans for the six most abundant precursor ions in the MS survey scan with a 2 Da window and fragmentation via CID with 35% normalized collision energy. The electrospray voltage applied was 1.8 kV. Both MS and MS/MS spectra were acquired using one microscan with a maximum fill-time of 1000 and 150 ms for MS analysis, respectively. Automatic gain control was used to prevent overfilling of the ion trap, and  $5 \times 10^4$  ions were accumulated in the ion trap to generate the MS/MS spectra. All the MS and MS/MS data were analyzed and processed using Proteome Discoverer (version 1.4, Thermo Scientific). The top 6 fragment ions per 100 Da of each MS/MS

spectrum were extracted for a protein database search using the Mascot search engine (version 2.4, Matrix Science) against the UniProtKB/Swiss-Prot sequence database. The top-six-peaks filter node improved the number of peptides identified with high confidence by reducing the number of peaks in the searched peak lists. This method avoids matching peptide candidates to spurious or noise peaks, thereby avoiding false peptide matches. The search parameters were set as follows: carbamidomethylation (C) as the fixed modification, oxidation (M), N-acetyl (protein), pyro-Glu/Gln (N-term Q), 6 ppm for MS tolerance, 0.8 Da for MS/MS tolerance, and 2 for missing cleavage. After database searching, the following filter criteria were applied to all the results: a minimum peptide length of six, a minimum of two unique peptides for the assigned protein, and peptide and protein identification with FDR less than 1% peptide filter were accepted. For precursor ion quantification, Proteome Discoverer was employed using a standard deviation of 2 ppm mass precision to create an extracted ion chromatogram (EIC) for the designated peptide.

### **Antibody Generation and Western Blot Analysis**

Cells were grown at 30 °C in YEPD medium. Cell lysates were prepared with lysis buffer (150 mM NaCl, 1 % nonidet P-40, 1 % deoxycholate, 0.1 % SDS, 50 mM Tris-HCl, pH 7.5, and protease inhibitors) or precipitated with trichloroacetic acid. To



generate antibodies, rabbits were boosted with carrier-conjugated phosphopeptides once per month. Pre-immune sera were collected before boosting. Blood was collected every 2 weeks, incubated at 37 °C for 30 mins, and separated via high-speed centrifugation. Clarified serum was incubated at 56 °C for 30 mins to remove complement. The specificity of antibodies was verified by means of peptide dot blot analysis. Images were captured and quantified by a bioluminescence imaging system (UVP BioSpectrum AC Imagine System, UVP).

#### **In Vitro Kinase and Phosphatase Assays**

The Ids2 ORF was cloned into the EcoRI and XhoI sites of pGEX-4T-1 for expression of GST-Ids2. A point mutation of Ids2-S148 was created to express GST-Ids2-S148A. Bovine heart catalytic subunit C (C<sub>b</sub>) was purchased from Millipore and PKI 6-22 (Millipore) was used as a negative control. PKA was obtained from crude extracts of yeast strain KT1115, and the PKA kinase-dead strain was used as a negative control (61). For the phosphatase assay, the full length Ptc2 and the C terminal-truncated Ptc2 (1-312) sequences were cloned into the BamHI and SalI sites of pGEX-4T-1 for the expression of GST-Ptc2 and GST-Ptc2 (1-312)-kinase-dead, respectively. GST proteins were expressed in the BL21 (DE3) pLysS strain in LB plus Amp and induced with 1 mM isopropyl-1-thio-β-D-galactopyranoside (IPTG) at

37 °C for 3 hours. The GST-tagged proteins were purified with Glutathione Sepharose 4B (GE) in binding buffer (140 mM NaCl, 2.7 mM KCl, 10 mM Na<sub>2</sub>HPO<sub>4</sub>, 1.8 mM KH<sub>2</sub>PO<sub>4</sub> pH 7.5, 1 % Triton X-100, 10 % glycerol) for 1 hour and eluted with elution buffer (50 mM Tris-HCl, 10 mM reduced glutathione pH 8.0).

The kinase assay was started by mixing different sources of PKA (50 mM extracts from KT1115) with GST-Ids2 substrates in kinase buffer (50 mM potassium phosphate pH 7.5, 0.1 mM EGTA, 0.1 mM EDTA, 15 mM MgCl<sub>2</sub>, 10 mM β-mercaptoethanol, 100 mM ATP). After 15 min at 30 °C, the samples were analyzed by Western blotting with Ids2 S148 phosphospecific antibodies. For the isotope assay, additional γ-<sup>32</sup>P-ATP was added to the mixture, and the aliquots were processed according to the phosphocellulose paper method (61).

For the phosphatase assay, phosphorylated Ids2 was generated by incubating GST-Ids2 with bovine heart catalytic subunit C (C<sub>b</sub>) in kinase buffer for 15 min at 30 °C. The reaction was stopped by incubating with PKI 6-22 at 30 °C for 10 min. GST-Ptc2 or GST-Ptc2 (1-312) was then added to the mixture for the phosphatase reaction. After 15 min at 30 °C, samples were analyzed by Western blotting with Ids2 S148 phosphospecific antibodies.

#### **Co-immunoprecipitation Assay**

W303 strains containing chromosomally-tagged *HSC82*-HA<sub>3</sub> and *IDS2* plasmids

(pRS426-*IDS2*-Myc<sub>13</sub>, pRS426-*ids2-S148A*-Myc<sub>13</sub>, or pRS426-*ids2-S148D*-Myc<sub>13</sub>)  
 were grown to exponential phase, and cells were harvested. Pellets were resuspended  
 in lysis buffer (50 mM NaCl, 0.1 % NP-40, 150 mM Tris-HCl pH 8.0) supplemented  
 with protease inhibitors (Roche). Cells were broken by a FastPrep-24 5G  
 Homogenizer (MP biomedical) and supernatants were collected after centrifugation.  
 The supernatants were mixed with either anti-HA (Roche) or anti-Myc (Roche)  
 antibodies, and followed by incubation with protein G Sepharose beads.  
 Immunoprecipitates were washed four times with lysis buffer and then eluted by  
 boiling in sample buffer. Samples were resolved by 7 % SDS-PAGE and analyzed  
 by Western blotting using the appropriate antibodies.

486

#### 487 **Yeast Two-hybrid Analysis**

488 To investigate the interaction between Ids2 and Hsc82, a DNA fragment  
 489 encoding the full length or N-terminal amino acids of Ids2 was ligated downstream of  
 490 the Gal4 DNA-binding domain in pGBDU-C1. A fragment encoding the full length or  
 491 N-terminal amino acids of Hsc82 was inserted in pGAD-C1 downstream of the Gal4  
 492 DNA-activating domain. The resulting plasmids were transformed into PJ69-4A and  
 493 Leu<sup>+</sup> and Ura<sup>+</sup> cells were selected. Cells were restreaked on SC-Leu-Ure-Ade-His  
 494 glucose plates to inspect the bait-prey reciprocity.

495

## 496 **His-tagged Metal Affinity Purification Assay**

497 An expression construct bearing Hsc82 with an N-terminal His<sub>6</sub>-tag was  
 498 transformed into *E. coli*. *E. coli* cultures were grown in LB media to an OD<sub>600</sub> of 0.8  
 499 and then induced with 0.5 mM IPTG for 4 hours. The His<sub>6</sub>-tag proteins were purified  
 500 with TALON His-tagged Protein Purification Resins (GE) in binding buffer (50 mM  
 501 Tris-HCl pH 8.0, 100 mM NaCl, 50 mM imidazole, 1 % Triton X-100) for 1 hour and  
 502 eluted with elution buffer (50 mM Tris-HCl pH 8.0, 250 mM imidazole, 10 %  
 503 glycerol).

504 For the His<sub>6</sub>-Hsc82 pull down assay, purified His<sub>6</sub>-Hsc82 were incubated with  
 505 purified GST-Ids2 or GST-Ids2-S148D in incubation buffer (20 mM Tris-HCl pH 7.5,  
 506 50 mM NaCl, 5% glycerol, 0.01% Triton X-100, 2 mM DTT) at 4 °C for 1 hour. The  
 507 reaction was precipitated with TALON His-tagged Protein Purification Resins (GE) at  
 508 4 °C for 1 hour. After washing three times with incubation buffer, the His<sub>6</sub>-tagged  
 509 Hsc82 and co-purified Ids2 proteins were recovered by elution with imidazole.

510

## 511 **ATPase Assay**

512 For the ATPase assay, His<sub>6</sub>-Hsc82, GST-Ids2, and GST-Ids2-S148D proteins  
 513 were isolated on appropriate columns (a HisTrap™ FF column for His-tagged

proteins and a GSTrap™ FF column for GST-tagged proteins) using AKTA Explorer FPLC (GE Healthcare) and further purified by size exclusion chromatography on a Superdex 200 column (GE healthcare) in 25 mM Hepes pH 7.2, 50 mM NaCl, and 5 mM β-mercaptoethanol.

The ATPase activity of Hsc82 was measured by using EnzChek phosphate assay kit (Molecular Probes, Inc.) as previously described (33). The His<sub>6</sub>-Hsc82 protein (2μM) was incubated with Ids2 or Ids2-S148D protein at 37 °C with 1 mM ATPase buffer (40 mM HEPES pH 7.5, 150 mM KCl, 5 mM MgCl<sub>2</sub>, 2 mM DTT) .The reactions were incubated for 90 min and then diluted 1:5 into a 100-μl phosphate assay reaction as outlined by the manufacturer's instructions. A standard curve was generated using the inorganic phosphate solution provided by the manufacturer (Molecular Probes, Inc.).

### **In Vivo Chaperone Assay**

A pRS316 plasmid containing the *GAL1-10* promoter and the SEL-allele of firefly luciferase (36) was purchased from Addgene and transformed into wild-type, *ids2Δ*, *hsc82Δ*, *ids2-S148A*, and *ids2-S148D* cells. Cells were inoculated into raffinose medium and cultured overnight prior to 3-hours galactose induction in various temperatures. Protein was precipitated by TCA and Western blot analysis was

533 performed with anti-firefly luciferase antibodies (Genetex).

534

# 535 **Induction of Gln1 Foci by Glucose Deprivation**

536 Cells with Gln1-GFP expression were inoculated into fresh SC glucose selection

537 medium to 0.3 OD/ml from overnight culture. When cells were regrown to 1 OD/ml,

538 cells were washed with PBS and then resuspended in SC medium without glucose for

539 45 min to induce foci formation. After induction, cells were harvested and fixed with

540 3.7% formaldehyde. Statistical significance was analyzed by the student's t-test using

541 GraphPad Prism 5 (GraphPad Software, Inc.).

542

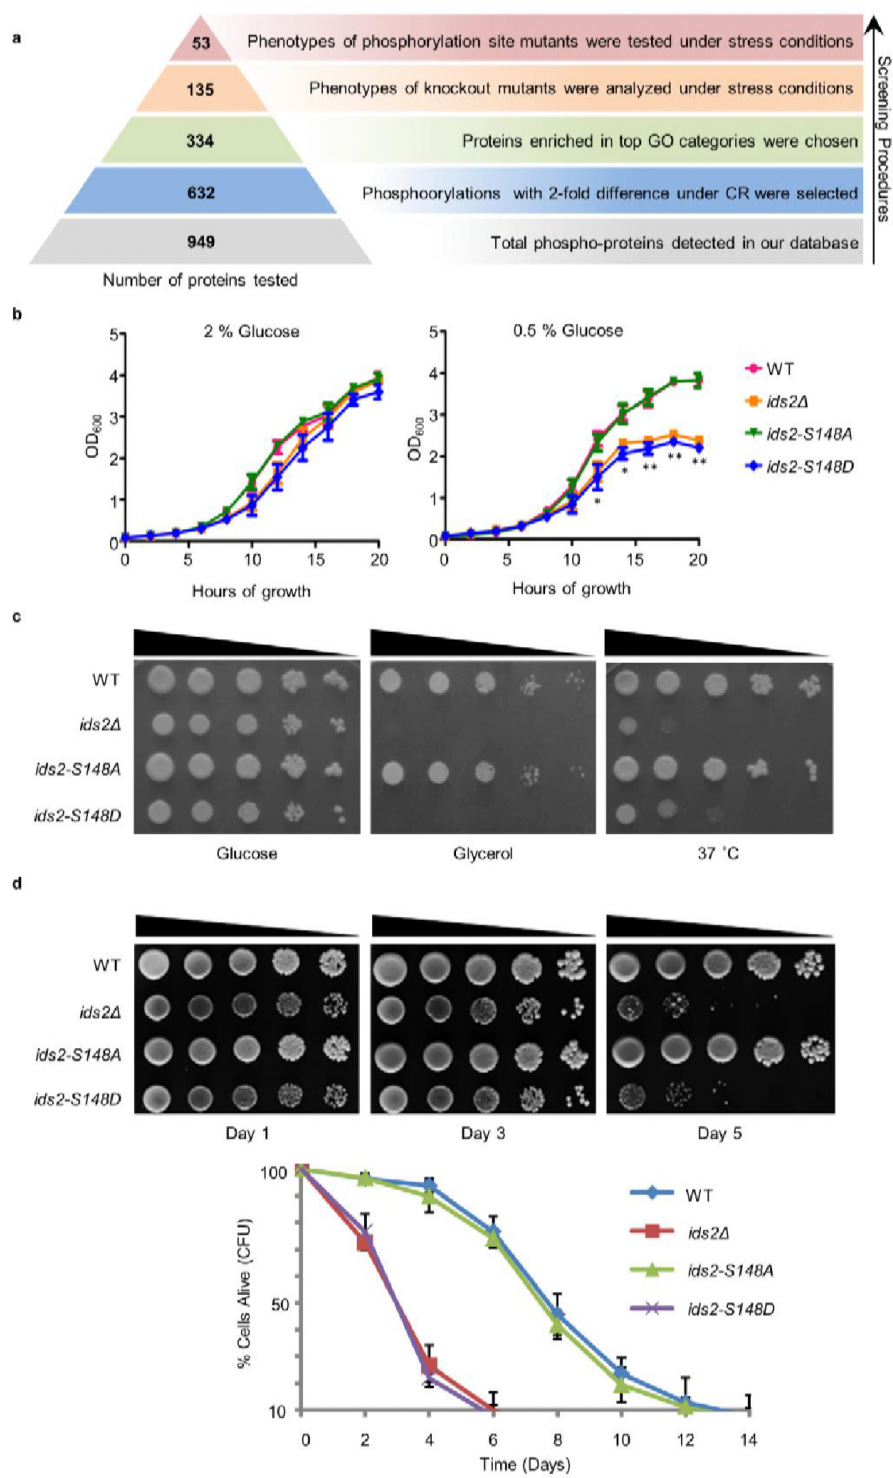

**Figure 1. Ids2-S148 phosphorylation influences stress tolerance, growth, and chronological lifespan.**

**a**, A schematic diagram highlights the steps in candidate screening. **b**, Growth curves

547 at 30 °C were monitored in triplicate and represented as the mean  $\pm$  S.E. (standard  
548 errors). **c**, Tenfold serially diluted cells were grown under heat shock (37 °C) in 2 %  
549 glucose or at 30 °C in 3 % glycerol. WT and S148D mutants were compared using  
550 Student's t-test. \*,  $p < 0.05$ . \*\*,  $p < 0.01$ . **d**, For the chronological lifespan assay, CFU  
551 viability was determined. 10-fold serial dilutions were spotted on YEPD plates.  
552 Quantitative CLS assay was assessed in triplicate by colony-forming capacity on  
553 YEPD plates.  
554



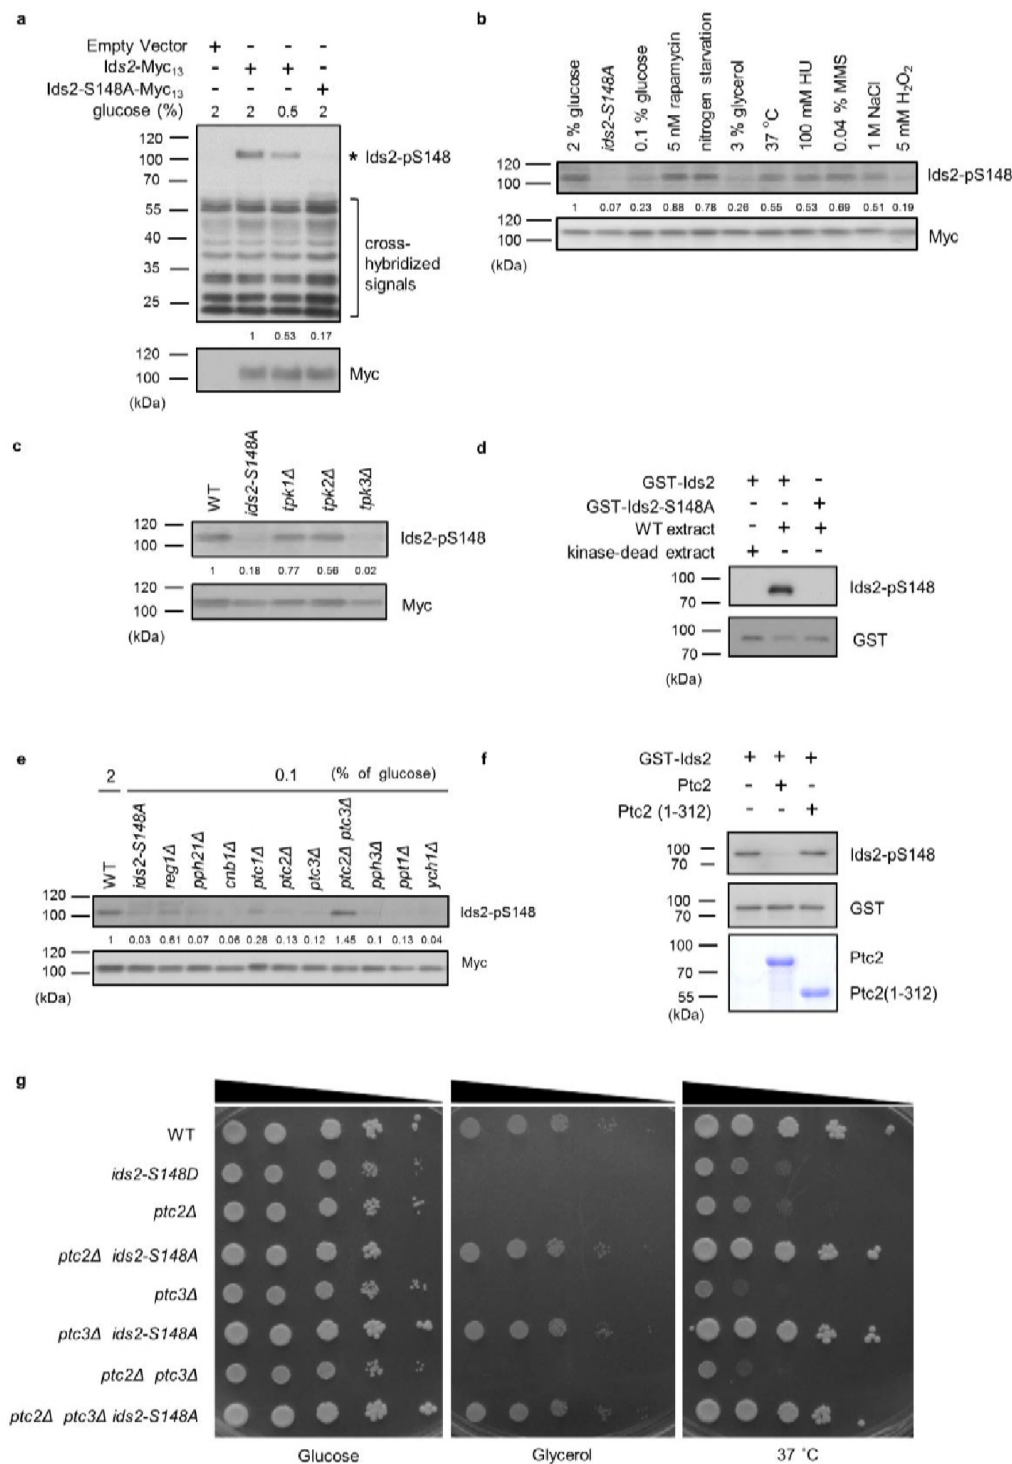

555

556 **Figure 2. PKA and PP2C regulate Ids2-S148 phosphorylation.**

557 **a-c, e**, Strains were transformed with pRS426-Ids2-Myc<sub>13</sub>, and lysates were examined

558 by Western blot analysis with the indicated antibodies. The numbers below are the

559 means of the intensity ratios of Ids2-p148/Myc compared with that of WT treated with  
 560 2 % glucose. **b**, Overnight cells were refreshed in medium with different treatments  
 561 for 3 hours. **d, f**. In vitro kinase and phosphatase assays were conducted as described  
 562 in the Methods section. **g**, Cells were spotted in 10-fold dilutions on YEPD or YEPG  
 563 plates and grown at 30 or 37 °C.  
 564

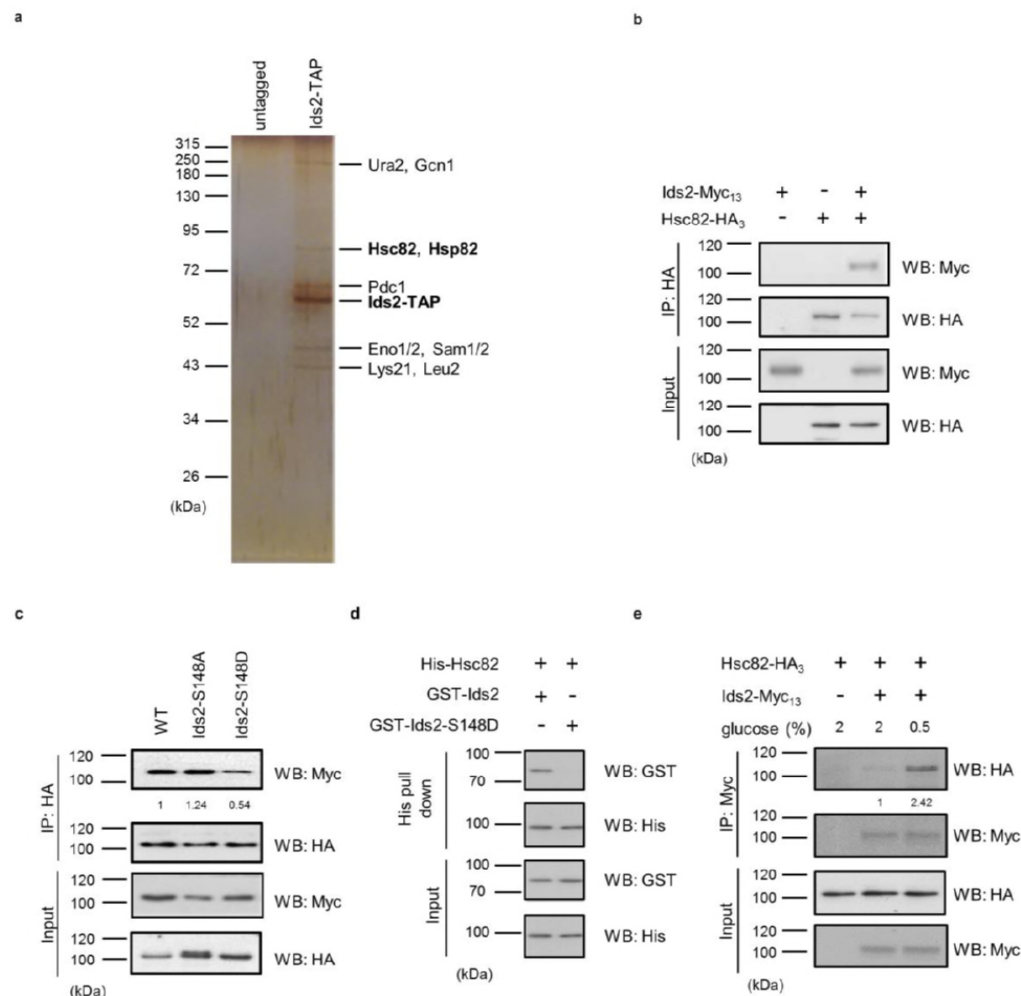

**Figure 3. Ids2 interacts with HSP90 families.**

**a**, A silver-stained gel of the affinity-purified Ids2. Both HSP90 families, Hsc82 and

Hsp82, were identified by LC-MS/MS analysis. **b**, A co-immunoprecipitation assay

was conducted using chromosomal-tagged Ids2-Myc<sub>13</sub> and Hsc82-HA<sub>3</sub>. **c**,

Co-immunoprecipitation assay between Hsc82 and Ids2 mutants. The levels of signal

compared with that of WT are shown below. **d**, Purified recombinant GST-Ids2 and

His<sub>6</sub>-Hsc82 proteins were subjected to a His-tagged Metal Affinity Purification assay.

**e**, Tagged strains were incubated in 2% (normal) or 0.5% (62) glucose. Ids2-Myc<sub>13</sub>

574 was used to co-immunoprecipitate Hsc82-HA<sub>3</sub>. The numbers below are the means of

575 the intensity ratios of HA/Myc compared with that of WT.

576

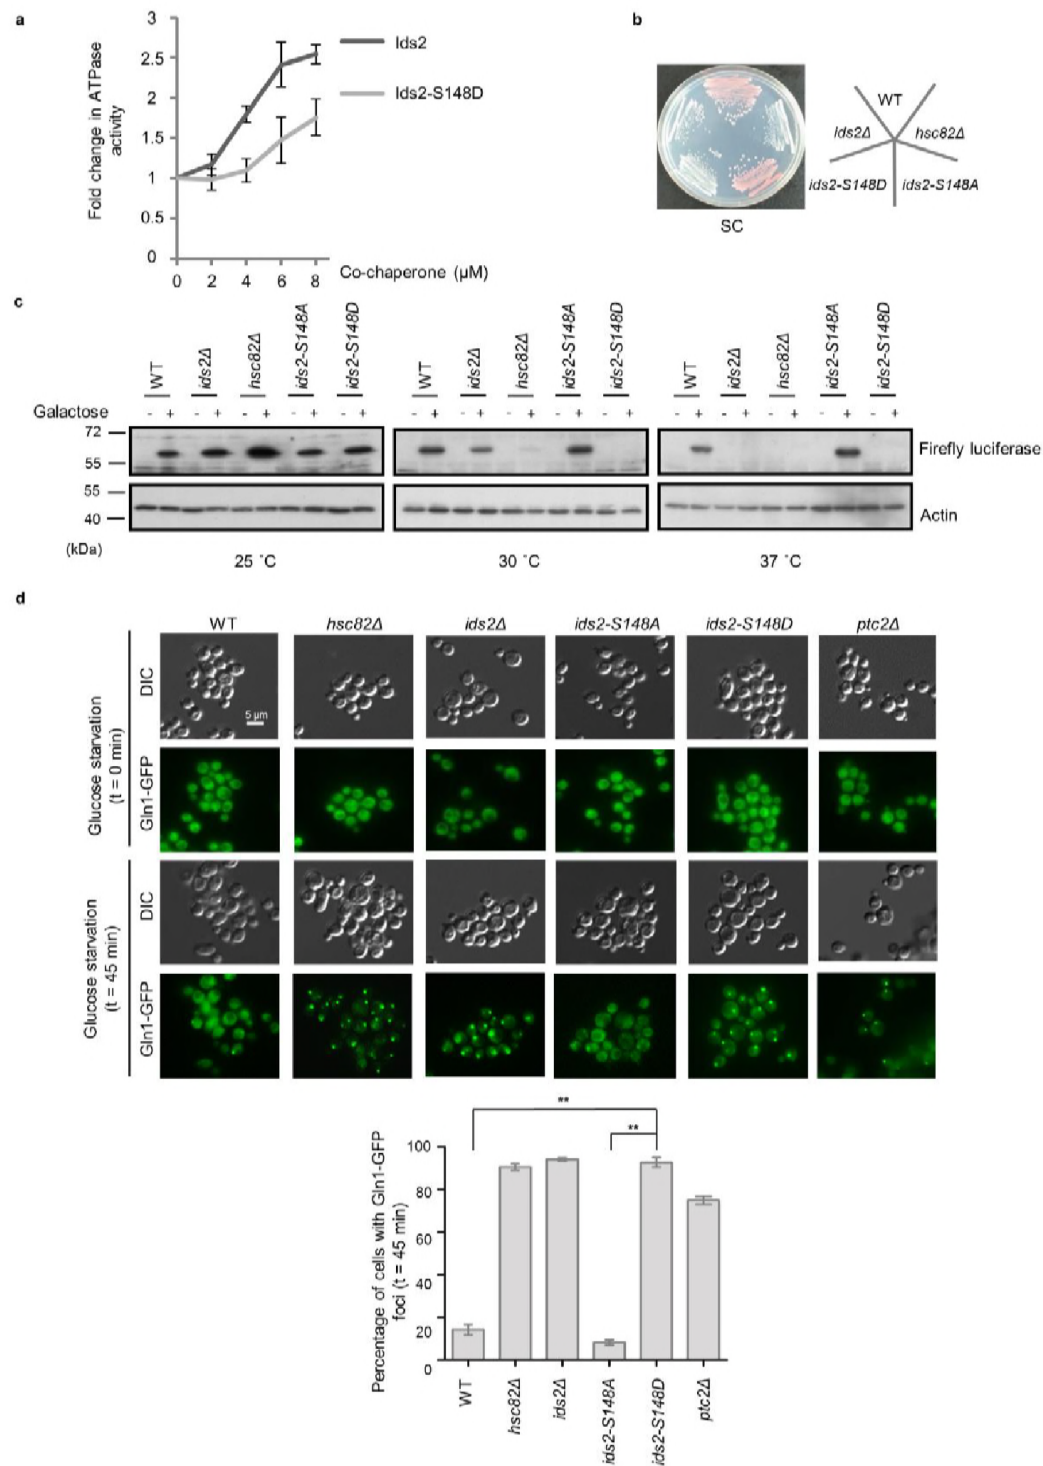

577

578 **Figure 4. Ids2 participates in the HSP90-regulated protein-folding response.**

579 **a**, The purified Hsc82 was mixed with Ids2 or Ids2-S148D, and the ATPase reaction

580 was incubated for 90 min at 37 °C. Error bars represent standard deviation calculated

581 from 3 independent experiments. **b**, Cells as indicated were streaked on SC glucose,  
 582 and the plate image was captured after 3 days. **c**, An in vivo chaperone assay was  
 583 conducted using an exogenously expressed firefly luciferase, and Western blot  
 584 analysis was performed. **d**, Endogenously expressed Gln1-GFP in WT and mutant  
 585 cells was measured after 45 min without glucose. At least 200 cells were counted for  
 586 each strain (\*\*,  $p < 0.01$ , Student's t-test, two-tailed).

587

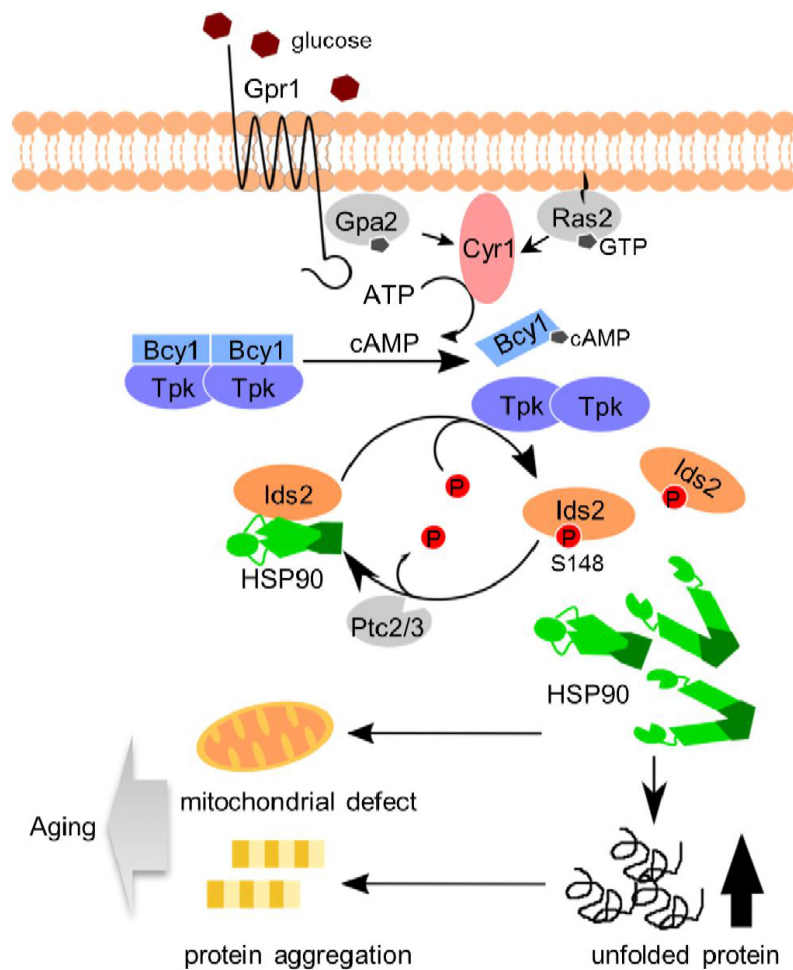

588

589 **Figure 5. A proposed model to describe how glucose intake down-regulates**

590 **chaperone activity and leads to aging.**

591 After glucose ingestion, cells convert ATP to cAMP to activate the PKA pathway.

592 Activated PKA phosphorylates co-chaperone Ids2 to dissociate it from the Hsp90

593 chaperone and reduce chaperone function, eventually leading to protein unfolding,

594 mitochondrial dysfunction and protein aggregation. However, under CR, PP2C

595 removes Ids2 phosphorylation to maintain Hsp90 chaperone function, elevates stress

596 tolerance, and further extends lifespan.

597



# References

1. Harman D. The aging process. *Proc Natl Acad Sci U S A*. 1981;78(11):7124-8.
2. Lopez-Otin C, Blasco MA, Partridge L, Serrano M, Kroemer G. The hallmarks of aging. *Cell*. 2013;153(6):1194-217.
3. McCay CM, Crowell MF, Maynard LA. The effect of retarded growth upon the length of life span and upon the ultimate body size. 1935. *Nutrition*. 1989;5(3):155-71.
4. de Cabo R, Liu L, Ali A, Price N, Zhang J, Wang M, et al. Serum from calorie-restricted animals delays senescence and extends the lifespan of normal human fibroblasts in vitro. *Aging (Albany NY)*. 2015;7(3):152-66.
5. de Cabo R, Carmona-Gutierrez D, Bernier M, Hall MN, Madeo F. The search for antiaging interventions: from elixirs to fasting regimens. *Cell*. 2014;157(7):1515-26.
6. Lin SJ, Kaeberlein M, Andalis AA, Sturtz LA, Defossez PA, Culotta VC, et al. Calorie restriction extends *Saccharomyces cerevisiae* lifespan by increasing respiration. *Nature*. 2002;418(6895):344-8.
7. Mattson MP, Wan R. Beneficial effects of intermittent fasting and caloric restriction on the cardiovascular and cerebrovascular systems. *J Nutr Biochem*. 2005;16(3):129-37.
8. Roth GS, Ingram DK, Lane MA. Caloric restriction in primates and relevance to humans. *Ann N Y Acad Sci*. 2001;928:305-15.
9. Lin SJ, Defossez PA, Guarente L. Requirement of NAD and SIR2 for life-span extension by calorie restriction in *Saccharomyces cerevisiae*. *Science*. 2000;289(5487):2126-8.
10. Tesch P, Sjodin B, Thorstensson A, Karlsson J. Muscle fatigue and its relation to lactate accumulation and LDH activity in man. *Acta Physiol Scand*. 1978;103(4):413-20.
11. Mortimer RK, Johnston JR. Life span of individual yeast cells. *Nature*. 1959;183(4677):1751-2.
12. Longo VD, Fabrizio P. Chronological aging in *Saccharomyces cerevisiae*. *Subcell Biochem*. 2012;57:101-21.
13. Kapahi P, Zid BM, Harper T, Koslover D, Sapin V, Benzer S. Regulation of lifespan in *Drosophila* by modulation of genes in the TOR signaling pathway. *Curr Biol*. 2004;14(10):885-90.
14. Fabrizio P, Pozza F, Pletcher SD, Gendron CM, Longo VD. Regulation of longevity and stress resistance by Sch9 in yeast. *Science*. 2001;292(5515):288-90.
15. Wei M, Fabrizio P, Hu J, Ge H, Cheng C, Li L, et al. Life span extension by calorie restriction depends on Rim15 and transcription factors downstream of

- 635 Ras/PKA, Tor, and Sch9. PLoS Genet. 2008;4(1):e13.
- 636 16. Fontana L, Partridge L, Longo VD. Extending healthy life span--from yeast to  
637 humans. Science. 2010;328(5976):321-6.
- 638 17. Orlova M, Kanter E, Krakovich D, Kuchin S. Nitrogen availability and TOR  
639 regulate the Snf1 protein kinase in *Saccharomyces cerevisiae*. Eukaryot Cell.  
640 2006;5(11):1831-7.
- 641 18. Lin SS, Manchester JK, Gordon JI. Sip2, an N-myristoylated beta subunit of  
642 Snf1 kinase, regulates aging in *Saccharomyces cerevisiae* by affecting cellular histone  
643 kinase activity, recombination at rDNA loci, and silencing. J Biol Chem.  
644 2003;278(15):13390-7.
- 645 19. Wierman MB, Maqani N, Strickler E, Li M, Smith JS. Caloric Restriction  
646 Extends Yeast Chronological Life Span by Optimizing the Snf1 (AMPK) Signaling  
647 Pathway. Mol Cell Biol. 2017;37(13).
- 648 20. Wang Z, Wilson WA, Fujino MA, Roach PJ. Antagonistic controls of autophagy  
649 and glycogen accumulation by Snf1p, the yeast homolog of AMP-activated protein  
650 kinase, and the cyclin-dependent kinase Pho85p. Mol Cell Biol. 2001;21(17):5742-52.
- 651 21. Wright RM, Poyton RO. Release of two *Saccharomyces cerevisiae* cytochrome  
652 genes, COX6 and CYC1, from glucose repression requires the SNF1 and SSN6 gene  
653 products. Mol Cell Biol. 1990;10(3):1297-300.
- 654 22. Mi H, Muruganujan A, Casagrande JT, Thomas PD. Large-scale gene function  
655 analysis with the PANTHER classification system. Nat Protoc. 2013;8(8):1551-66.
- 656 23. Dilova I, Easlson E, Lin SJ. Calorie restriction and the nutrient sensing signaling  
657 pathways. Cell Mol Life Sci. 2007;64(6):752-67.
- 658 24. Morselli E, Maiuri MC, Markaki M, Megalou E, Pasparaki A, Palikaras K, et al.  
659 Caloric restriction and resveratrol promote longevity through the Sirtuin-1-dependent  
660 induction of autophagy. Cell Death Dis. 2010;1:e10.
- 661 25. Cheong H, Yorimitsu T, Reggiori F, Legakis JE, Wang CW, Klionsky DJ. Atg17  
662 regulates the magnitude of the autophagic response. Mol Biol Cell.  
663 2005;16(7):3438-53.
- 664 26. Sia RA, Mitchell AP. Stimulation of later functions of the yeast meiotic protein  
665 kinase Ime2p by the IDS2 gene product. Mol Cell Biol. 1995;15(10):5279-87.
- 666 27. Neuberger G, Schneider G, Eisenhaber F. pKaPS: prediction of protein kinase A  
667 phosphorylation sites with the simplified kinase-substrate binding model. Biol Direct.  
668 2007;2:1.
- 669 28. Sharmin D, Sasano Y, Sugiyama M, Harashima S. Effects of deletion of different  
670 PP2C protein phosphatase genes on stress responses in *Saccharomyces cerevisiae*.  
671 Yeast. 2014;31(10):393-409.
- 672 29. Liu PJ, Chen CD, Wang CL, Wu YC, Hsu CW, Lee CW, et al. In-depth

673 proteomic analysis of six types of exudative pleural effusions for nonsmall cell lung  
674 cancer biomarker discovery. *Molecular & cellular proteomics : MCP*.  
675 2015;14(4):917-32.

676 30. Schopf FH, Biebl MM, Buchner J. The HSP90 chaperone machinery. *Nat Rev*  
677 *Mol Cell Biol*. 2017;18(6):345-60.

678 31. Li J, Soroka J, Buchner J. The Hsp90 chaperone machinery: conformational  
679 dynamics and regulation by co-chaperones. *Biochim Biophys Acta*.  
680 2012;1823(3):624-35.

681 32. Richter K, Walter S, Buchner J. The Co-chaperone Sba1 connects the ATPase  
682 reaction of Hsp90 to the progression of the chaperone cycle. *J Mol Biol*.  
683 2004;342(5):1403-13.

684 33. Wolmarans A, Lee B, Spyropoulos L, LaPointe P. The Mechanism of Hsp90  
685 ATPase Stimulation by Aha1. *Sci Rep*. 2016;6:33179.

686 34. Francis BR, Thorsness PE. Hsp90 and mitochondrial proteases Yme1 and  
687 Yta10/12 participate in ATP synthase assembly in *Saccharomyces cerevisiae*.  
688 *Mitochondrion*. 2011;11(4):587-600.

689 35. Wang Y, Singh U, Mueller DM. Mitochondrial genome integrity mutations  
690 uncouple the yeast *Saccharomyces cerevisiae* ATP synthase. *J Biol Chem*.  
691 2007;282(11):8228-36.

692 36. Distel B, Gould, SJ., Voorn-Brouwer, T., van der Berg, M., Tabak, HF.,  
693 Subramani, S. The carboxyl-terminal tripeptide serine-lysine-leucine of firefly  
694 luciferase is necessary but not sufficient for peroxisomal import in yeast. *New Biol*.  
695 1992;4(2):157-65.

696 37. Chiti F, Dobson CM. Protein Misfolding, Amyloid Formation, and Human  
697 Disease: A Summary of Progress Over the Last Decade. *Annu Rev Biochem*.  
698 2017;86:27-68.

699 38. O'Connell JD, Tsechansky M, Royal A, Boutz DR, Ellington AD, Marcotte EM.  
700 A proteomic survey of widespread protein aggregation in yeast. *Mol Biosyst*.  
701 2014;10(4):851-61.

702 39. Franzosa EA, Albanese V, Frydman J, Xia Y, McClellan AJ. Heterozygous yeast  
703 deletion collection screens reveal essential targets of Hsp90. *PLoS One*.  
704 2011;6(11):e28211.

705 40. Yang X, Zhang Y, Xu W, Deng R, Liu Y, Li F, et al. Potential role of Hsp90 in rat  
706 islet function under the condition of high glucose. *Acta Diabetol*. 2016;53(4):621-8.

707 41. Lei H, Venkatakrishnan A, Yu S, Kazlauskas A. Protein kinase A-dependent  
708 translocation of Hsp90 alpha impairs endothelial nitric-oxide synthase activity in high  
709 glucose and diabetes. *J Biol Chem*. 2007;282(13):9364-71.

710 42. Verna J, Lodder A, Lee K, Vagts A, Ballester R. A family of genes required for

711 maintenance of cell wall integrity and for the stress response in *Saccharomyces*  
712 *cerevisiae*. Proc Natl Acad Sci U S A. 1997;94(25):13804-9.

713 43. Petkova MI, Pujol-Carrion N, Arroyo J, Garcia-Cantalejo J, Angeles de la  
714 Torre-Ruiz M. Mtl1 is required to activate general stress response through Tor1 and  
715 Ras2 inhibition under conditions of glucose starvation and oxidative stress. J Biol  
716 Chem. 2010;285(25):19521-31.

717 44. Arino J, Casamayor A, Gonzalez A. Type 2C protein phosphatases in fungi.  
718 Eukaryot Cell. 2011;10(1):21-33.

719 45. Warmka J, Hanneman J, Lee J, Amin D, Ota I. Ptc1, a type 2C Ser/Thr  
720 phosphatase, inactivates the HOG pathway by dephosphorylating the  
721 mitogen-activated protein kinase Hog1. Mol Cell Biol. 2001;21(1):51-60.

722 46. Aluru M, McKinney T, Venero AL, Choudhury S, Torres M. Mitogen-activated  
723 protein kinases, Fus3 and Kss1, regulate chronological lifespan in yeast. Aging  
724 (Albany NY). 2017;9(12):2587-609.

725 47. Ali MM, Roe SM, Vaughan CK, Meyer P, Panaretou B, Piper PW, et al. Crystal  
726 structure of an Hsp90-nucleotide-p23/Sba1 closed chaperone complex. Nature.  
727 2006;440(7087):1013-7.

728 48. Rohl A, Rohrberg J, Buchner J. The chaperone Hsp90: changing partners for  
729 demanding clients. Trends Biochem Sci. 2013;38(5):253-62.

730 49. Meyer P, Prodromou C, Liao C, Hu B, Roe SM, Vaughan CK, et al. Structural  
731 basis for recruitment of the ATPase activator Aha1 to the Hsp90 chaperone machinery.  
732 EMBO J. 2004;23(6):1402-10.

733 50. Wang YT, Tsai CF, Hong TC, Tsou CC, Lin PY, Pan SH, et al. An  
734 informatics-assisted label-free quantitation strategy that depicts phosphoproteomic  
735 profiles in lung cancer cell invasion. Journal of proteome research.  
736 2010;9(11):5582-97.

737 51. Kanehisa M, and Susumu Goto. KEGG: Kyoto Encyclopedia of Genes and  
738 Genomes. Nucleic Acids Research. 2000;28(1):27-30.

739 52. Portela P, Howell S, Moreno S, Rossi S. In vivo and in vitro phosphorylation of  
740 two isoforms of yeast pyruvate kinase by protein kinase A. J Biol Chem.  
741 2002;277(34):30477-87.

742 53. Roskoski R. Assays of protein kinase. Methods in Enzymology. 1983;99:3-6.

743 54. Vizcaino JA, Deutsch EW, Wang R, Csordas A, Reisinger F, Rios D, et al.  
744 ProteomeXchange provides globally coordinated proteomics data submission and  
745 dissemination. Nat Biotechnol. 2014;32(3):223-6.

746 55. Ashburner M, Ball CA, Blake JA, Botstein D, Butler H, Cherry JM, Davis AP,  
747 Dolinski K, Dwight SS, Eppig JT, Harris MA, Hill DP, Issel-Tarver L, Kasarskis A,  
748 Lewis S, Matese JC, Richardson JE, Ringwald M, Rubin GM, Sherlock G. Gene

749 ontology: tool for the unification of biology. The Gene Ontology Consortium. Nature  
750 genetics. 2000;25(1):25-49.

751 56. Dennis G Jr1 SB, Hosack DA, Yang J, Gao W, Lane HC, Lempicki RA. DAVID:  
752 Database for Annotation, Visualization, and Integrated Discovery. Genome Biol.  
753 2003;4(5):3.

754 57. Postnikoff SD, Harkness TA. Replicative and chronological life-span assays.  
755 Methods Mol Biol. 2014;1163:223-7.

756 58. Longo VD, Shadel GS, Kaerberlein M, Kennedy B. Replicative and chronological  
757 aging in *Saccharomyces cerevisiae*. Cell Metab. 2012;16(1):18-31.

758 59. Smith DL, Jr., McClure JM, Matecic M, Smith JS. Calorie restriction extends the  
759 chronological lifespan of *Saccharomyces cerevisiae* independently of the Sirtuins.  
760 Aging Cell. 2007;6(5):649-62.

761 60. Tsai CF, Wang YT, Chen YR, Lai CY, Lin PY, Pan KT, et al. Immobilized metal  
762 affinity chromatography revisited: pH/acid control toward high selectivity in  
763 phosphoproteomics. Journal of proteome research. 2008;7(9):4058-69.

764 61. Toone WM, Jones N. Stress-activated signalling pathways in yeast. Genes to  
765 cells : devoted to molecular & cellular mechanisms. 1998;3(8):485-98.

766 62. French JB, Zhao H, An S, Niessen S, Deng Y, Cravatt BF, et al. Hsp70/Hsp90  
767 chaperone machinery is involved in the assembly of the purinosome. Proc Natl Acad  
768 Sci U S A. 2013;110(7):2528-33.

769 63. Sievers F, Higgins DG. Clustal omega. Curr Protoc Bioinformatics. 2014;48:3 13  
770 1-6.

771

772

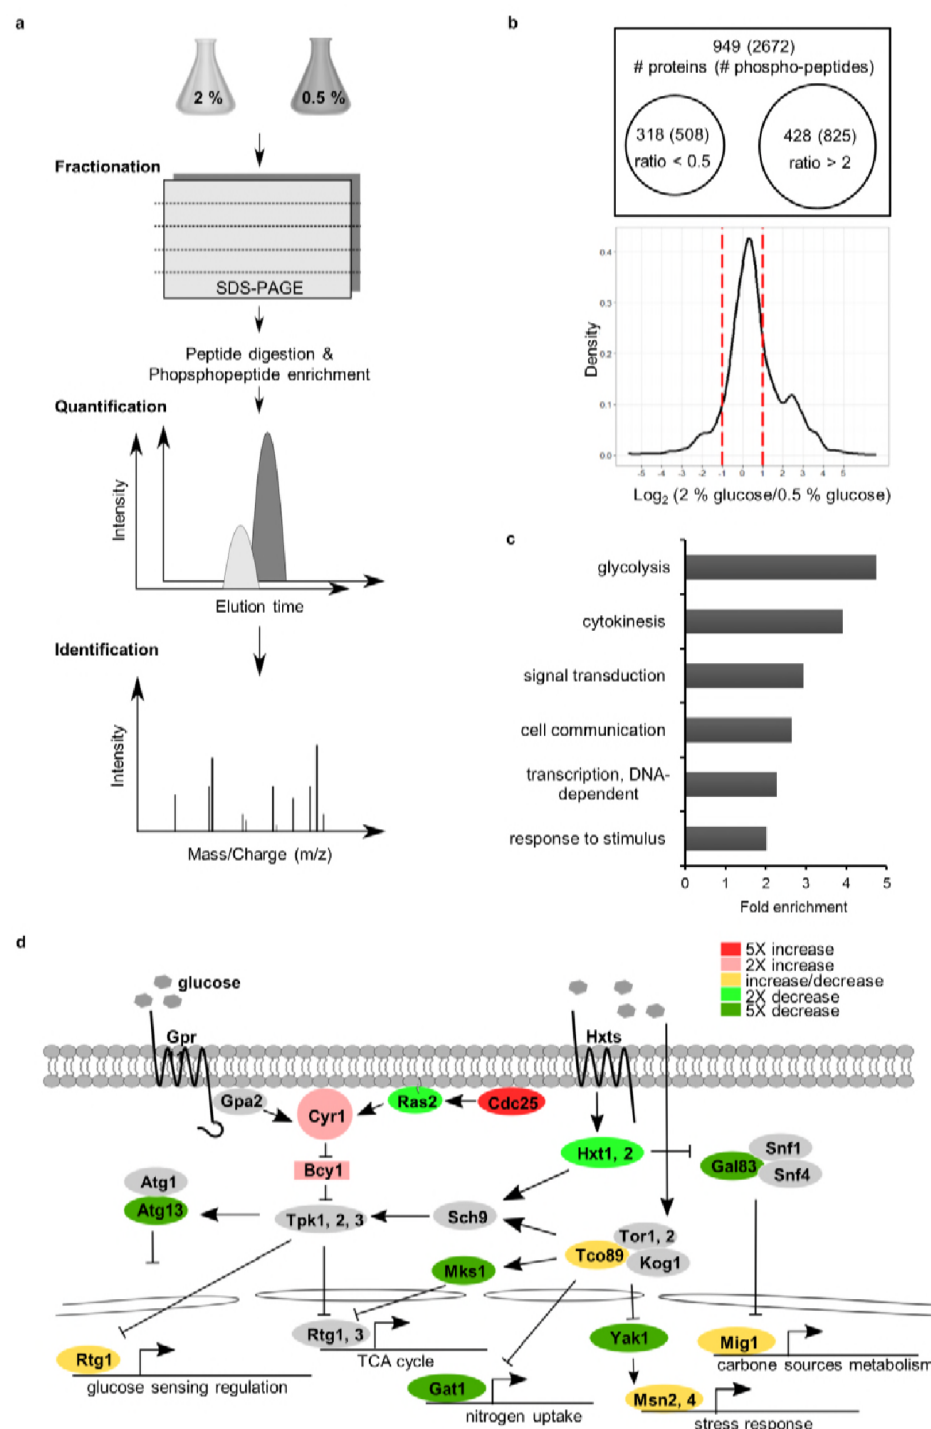

773

774 **S1 Fig. The strategy used for large-scale identification of CR-modulated**  
775 **pathways.**

776 **a, Experimental workflow for quantitative proteomics-identified CR-regulated**

777 proteins in yeast. **b**, Venn diagrams represent the increased abundance of  
 778 phosphorylated peptides (proteins) under normal conditions compared to CR by over  
 779 50 % ( $\log_2 > 1$ ) or the decreased abundance of phosphorylated peptides (proteins)  
 780 under normal conditions versus CR treatment by over 50 % ( $\log_2 < -1$ ). The  
 781 distribution of  $\log_2$  (2 % glucose / 0.5 % glucose) ratios for phosphopeptides are  
 782 illustrated by a density plot. **c**, GO term analysis of phosphorylated proteins regulated  
 783 by CR. The top 6 enriched biological processes are shown. **d**, Some phosphoproteins  
 784 regulated by CR are factors in the glucose-sensing pathway. The phosphoproteins  
 785 with a greater than 2-fold change are labelled with different colors to indicate their  
 786 ratios. The phosphoproteins containing both phosphorylation and dephosphorylation  
 787 sites under CR are labelled in yellow.  
 788



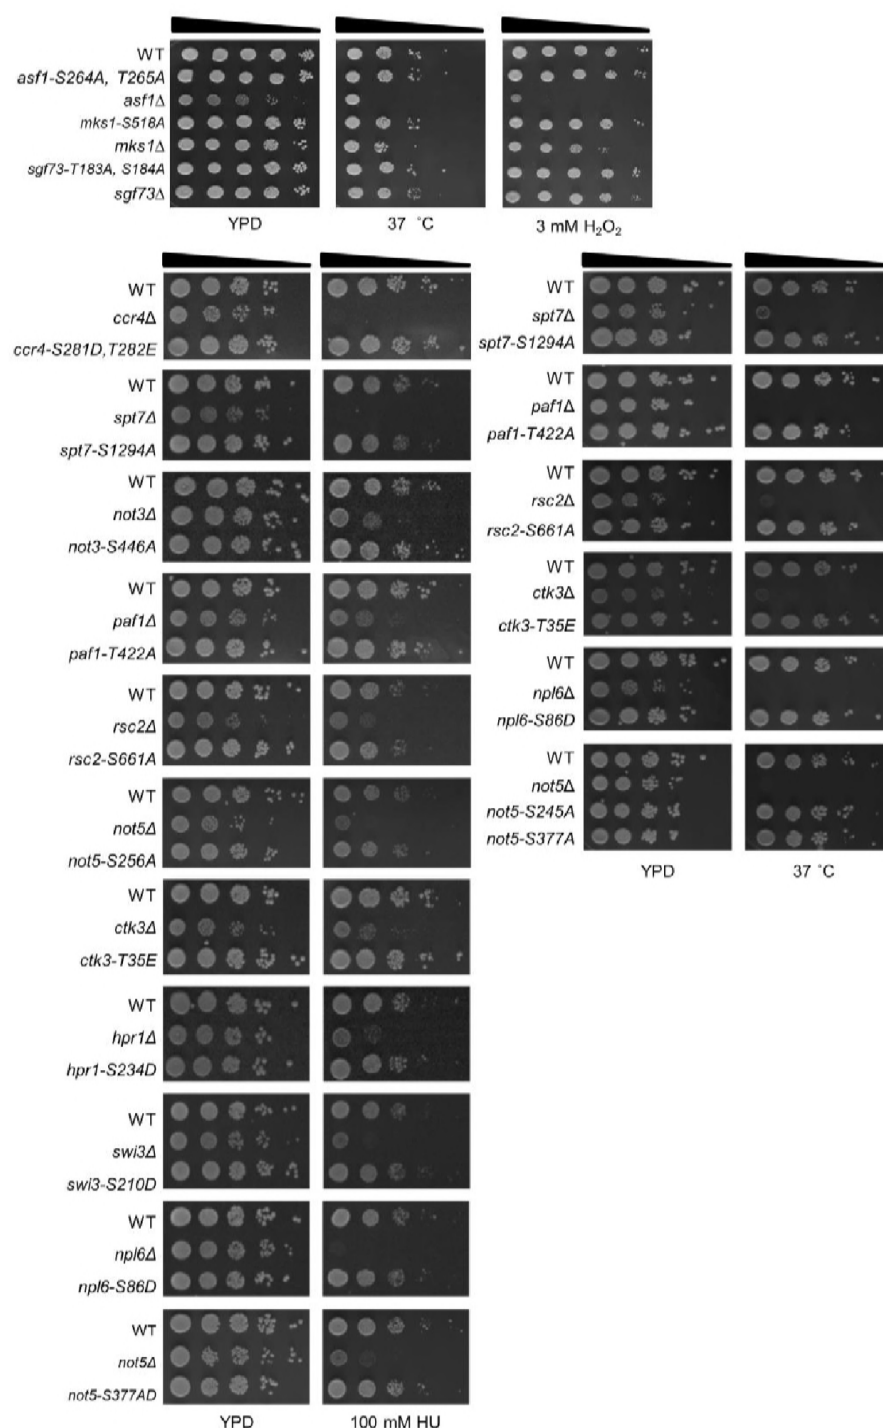

789

790 **S2 Fig. Most phosphorylation site mutants displayed wild-type phenotypes under**

791 **stress conditions.**

792 Phosphorylation site mutants as indicated were spotted onto YPD plates. Images were



793 taken after 3 days under different stresses. Of the 53 phosphorylation site mutants,

794 only some representative examples are shown here.

795

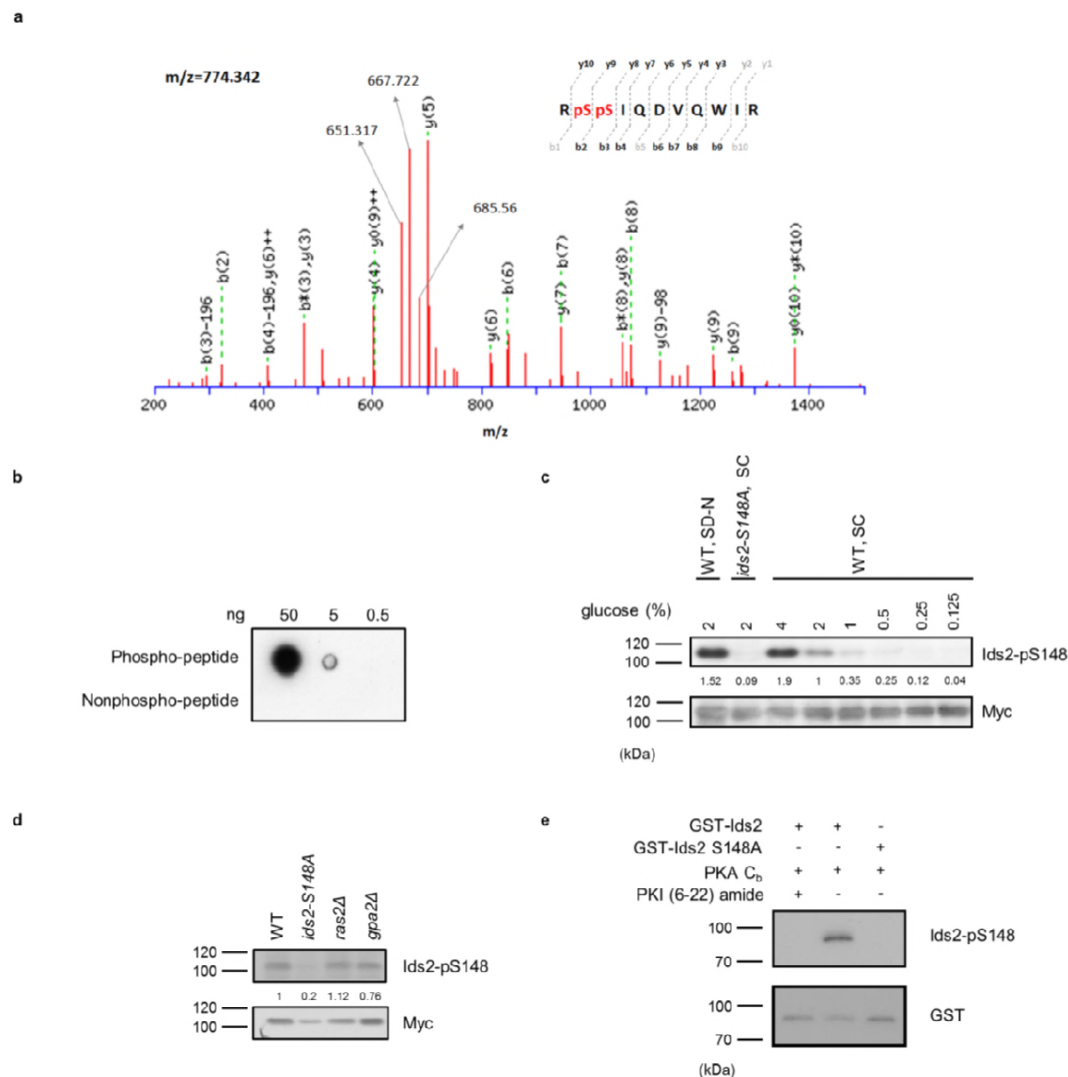

### S3 Fig. Characterization of the phosphospecific antibodies against Ids2 S148.

**a**, The mass spectrum of the phosphopeptide Ids2 S148 recorded in the linear mode. **b**,

Peptide spotting showed the specificity of the phospho-Ids2-S148 antibodies. **c**, The

phosphorylation level of Ids2-S148 under different conditions. The WT strain was

transformed with pRS426-Ids2-Myc<sub>13</sub> (WT) or pRS426-Ids2-S148A-Myc<sub>13</sub>

(*ids2*-S148A). Overnight cultures of these strains were refreshed to OD<sub>600</sub> = 0.3 in

SC-Ura with 4%, 2%, 1%, 0.5%, 0.25%, and 0.125 % glucose for 3 hours. For

nitrogen starvation, the overnight culture was refreshed to  $OD_{600} = 0.3$  in SC-Ura with 2% glucose for 3 hours and then transferred to SC medium lacking nitrogen (SD-N) with 2% glucose for 2 hours. Cell lysates were prepared for Western blot analysis. The numbers below are the intensity ratios of Ids2-p148/Myc compared with those of WT.

**d**, WT and deletion strains were transformed with pRS426-Ids2-Myc<sub>13</sub>. Cells were grown in SC medium with 2% glucose, and lysates were prepared for Western blot analysis. **e**, In vitro PKA activity was assayed using bovine heart catalytic subunit C (C<sub>b</sub>), and the PKA inhibitor PKI 6-22 was used as a negative control. GST-Ids2 and GST-Ids2-S148A served as substrates. Activities were detected by Western blot analysis using the phosphospecific antibody. The total amount of Ids2 protein was detected by a GST antibody.

815

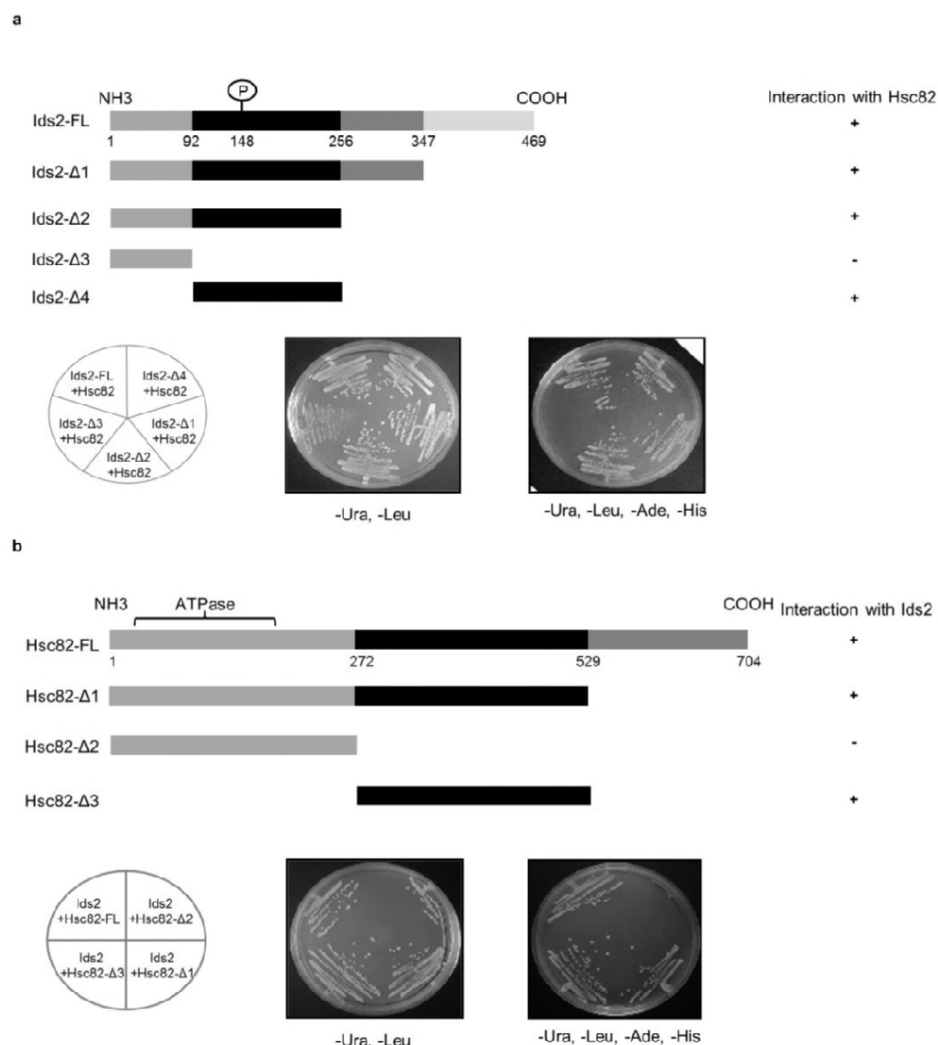

816

817 **S4 Fig. Mapping the interacting domains between Ids2 and Hsc82 by the yeast**

818 **two-hybrid assay.**

819 **a**, The upper panel shows a schematic diagram of various pGBDU-Ids2 truncations.

820 The two-hybrid assay was conducted using various truncated Ids2 proteins as the bait

821 and full-length Hsc82 as the prey. Cells were restreaked onto SC-Leu-Ura-Ade-His

822 glucose plates to investigate the bait-prey reciprocity. **b**, The upper panel depicts a

823 schematic diagram of various Hsc82 truncations. The assay was conducted as

824 described in **a** to define the Ids2-Hsc82 interaction domain in Hsc82.

825

826

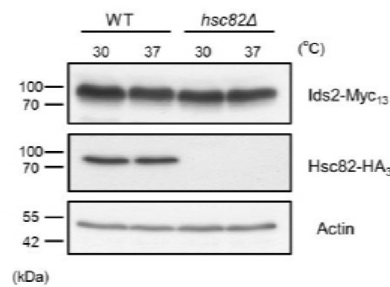

827

828 **S5 Fig. The effect of heat-shock stress or *hsc82Δ* on the protein levels of Ids2.**

829 Chromosomally tagged Ids2-Myc<sub>13</sub> and Hsc82-HA<sub>3</sub> strains were cultured under

830 normal (30 °C) or heat-shock (37 °C) conditions for 3 hours. Cell lysates were

831 examined by Western blot analysis using Myc or HA antibodies. Actin served as a

832 loading control.

833

```

FKBP4_H 1 MTAEEMKATESGAQSAFLPMGVDSI SPKQDEGVLLKVI KREGTGTEPMI GDRVFVHYTGL L DGTKFDS LDRKDKFSFDLGK---GEVI
FKBP4_M 1 MTAEEMKAAENGASAPLPLEGVDSI SPKQDEGVLLKVI KREGTGTEPMI GDRVFVHYTGL L DGTKFDS LDRKDKFSFDLGK---GEVI
FKB59_D 1 -----MPEGNKI DLSGGDGVLLKEI LKEGTGTEPHSGTIVSLHYTGL LVDGTEFDSLSRNEPFESLGGK---GNVI
O45418_C 1 -----MSGEKI DITPKKGGVLLKEI LKEGGGVVKKPTTGTIVKVHYTGL LVDGTEFDSLSRDRGGQFSLNLR---GNVI
Ids2_Y 1 -----MDNQGESLSEDI TGL LAAAYRKSISSESQDNPLLLNPNNSPI LPT

FKBP4_H 88 KAWDI AIAIKVCEVCHI TCKPEYAYGAGSPPKI PPNATLVFEVELFEFKGEDLTEEDGSI I RRI QTRGEGYAK-----PNEGAI VE
FKBP4_M 88 KAWDI AVATMKVCEVCHI TCKPEYAYGAGSPPKI PPNATLVFEVELFEFKGEDLTEEDGSI I RRI RTRGEGYAR-----PNDGAMVE
FKB59_D 70 KAFDMGVATMKLGERCFLT CAPNYAYGAGSPPAI PPDATLI FEELMLGWKGEDLSPNQDGS I DRTI LEASDKKRT-----PSDGAFAVK
O45418_C 71 KGWDLGVATMKGEVAEFTI RSDYGYGAGSPPKI PPGATLI FEVELFEWSEADISPRDGTI LRTI I VEGSKNSF-----PNDTSKVL
Ids2_Y 46 DRYSPPEPATMVEGNA-----MNLSSLARSTQQQRLYGSSQTRKESDQQQDYLQLFK

FKBP4_H 172 VALEGYYKDKLFDDELRFELI GEGENLDLPYGLERMI QRMKEK-----GEHSI ---V---YLK-PSYAFG-SVGKEKFIQIP-----
FKBP4_M 172 VALEGYHKDRLFDDELRFELI GEGENLDLPYGLERMI QRMKEK-----GEHSI ---V---YLK-PSYAFG-SVGKEKFIQIP-----
FKB59_D 154 AHI SGGFEGRVFEDDVEFEDYGEKAI GI I DGVSL EKNNV-----GETSR ---I---KIQ-ARYAFG-ARGNEEFKIP-----
O45418_C 155 AHCVGTYQGTETFYNSVNFHI GEGSEGLPEGYERLRRFQL-----GEKSK ---I---EIRGHKTYTG-NSPPAGSNIPV-----
Ids2_Y 99 HHYS-----LGQETRESVSDI LNDLTLSPEPSERASPI RQPSVDVPLTTRRSI QDVQWI RHLNLPSSSES GASSEPTNSDGFNLNQ

FKBP4_H 240 -----NMELKYELHKSFEKAKESDEMENSEKLEQSTI VKERGTVFKEGKYKQALLQYKKI VSWLEYESSFSNEEAQK
FKBP4_M 240 -----HAEIRYEVRLKSFEKAKESDEMENSEKLEQSN I VKERGTAYFKEGKYKQALLQYKKI VSWLEYESSFSGEEMQK
FKB59_D 222 -----NATVEYTVKVDGKGLLEKLSDEIRLAEAKVYKEGTNYFKKENWALAI KMYTKCKNI LPTTV-----HTNEE
O45418_C 224 -----NATLEFTI FKEFEKVPATIEATAEKLDAAKQAKDRGTMYLQKGNLKLAYNKYKRAEVELEKSTDEPKMAE
Ids2_Y 184 SRAMI TI LHDSSAESLQAVI VLAESKKNVNSQYNLVLHSSSEYNA-----FQL-----AQVG

FKBP4_H 314 AQAEERLASHLILAMCHLKLQAFSA-----AIESNKALIEL-----DSNNEKGLFRRGEAHAV
FKBP4_M 314 VHAERLASHLILAMCHLKLQAFSA-----AIESNKALIEL-----DSNNEKGLFRRGEAHAV
FKB59_D 292 VKKIKVATHSLILALCHOKSNDHFE-----AKQENEVVAL-----DKNNVKALYRRGCNITM
O45418_C 298 RETILNGAYLILSLVCSKQNEQLE-----CIKWDKVLLET-----KPGNVKALYRKATALITM
Ids2_Y 236 I KTEI I DEVI LFMNFGTSGSGSASSQSTETKGELNFKVKKLFFSLI DRFELI CYLSPTCLVLQNI DELLESTEVSDI DNKTCVLS

FKBP4_H 367 NDFELARADFQKVLQLY--PNKAAKTQLAVCQQRIR--QLAREKKLYANMERLAEENKAKAEASSGDHPT-----DTEMKEEQKSN
FKBP4_M 367 NDFELARADFQKVLQLY--PNKAAKTQLAVCQQRIR--QLAREKKLYANMERLAEENKAKAEASSGDHPT-----DAEMKGERNN
FKB59_D 345 ELEDALDFQKVLQLE--PCKAAANQIIICQOKLKE--SKNKEKKLYANMERLAEENKAKAEASSGDHPT-----CGESSEDAKR
O45418_C 351 NEVRDAIKLFEKIVEVE--PENKAAAOQIIICVRNTI RE--QNERDKKRFKLEAKI STEEDKPTNTVEDEIIV-----ASTSGSSSTSN
Ids2_Y 326 NKVNYI NEDLVSNQDQSSAEYDDDDPIIILKPNRAVAMCI KEYFTI YGNDEGES-----KRSMFHQMNDLQIMKALFGDKWSYI DSVG

FKBP4_H 448 T-----AGSQSQ-----VETEA-----
FKBP4_M 447 V-----AENQSR-----VETEA-----
FKB59_D 426 E-----AELT-----LERDNIIM-----
O45418_C 431 A-----
Ids2_Y 412 YCAVPI ASVPANRLNYKI IEFKI LKPWERQNYI AAGQHRESI MNKVLDLWRDLNQAN

```

834

835 **S6 Fig. An alignment of Ids2 and its homologs.**

836 Multiple sequence alignment was performed between Ids2 and its predicted  
837 homologues by Clustal Omega program (63). S148 of Ids2 is marked with an asterisk.  
838 H, *Homo sapiens*; M, *Mus musculus*; D, *Drosophila melanogaster*; C, *Caenorhabditis*  
839 *elegans*; Y, *Saccharomyces cerevisiae*.

840

841 **S1 Data. The list of total phosphopeptides influenced by calorie restriction.**

842 **S2 Data. Genes and mutation sites for functional screening.**

843 **S3 Data. A list of peptides detected from Mass Spectrometry analysis of the**  
844 **Ids2-TAP co-purified proteins.**

845 **S4 Data. Yeast strains, plasmids, and primer sets used in this study.**

846

## 847 **Acknowledgements**

848       We thank Prof. Silvia Rossi for yeast strains. We also thank Chia-Feng Tsai for  
849       his assistance of mass spectrometry analysis. This work was financially supported by  
850       the “Center of Precision Medicine” from The Featured Areas Research Center  
851       Program within the framework of the Higher Education Sprout Project by the  
852       Ministry of Education (MOE) and the Ministry of Science and Technology (MOST  
853       106-2311-B-002-010-MY3) in Taiwan.

854

## 855 **Contributions**

856       Y.-C.C., P.-H.J., H.-M.C., C.-H.C., Y.-T.W., and C.-J.Y. conducted and analyzed  
857       the experiments. Y.-C.C., P.-H.J., Y.-J.C., C.-J.Y., and S.-C.T. designed the  
858       experiments and interpreted the data. Y.-C.C., P.-H.J., H.-M.C., and S.-C.T. edited the  
859       manuscript. S.-C.T. conceived and supervised this study.

## 860 **Competing interests**

861       The authors declare no competing financial interests.

862
